1 **Paired CRISPR/Cas9 guide-RNAs enable high-throughput deletion scanning (ScanDel) of a**  
2 **Mendelian disease locus for functionally critical non-coding elements**

3  
4 Molly Gasperini<sup>1\*#</sup>, Gregory M. Findlay<sup>1\*</sup>, Aaron McKenna<sup>1</sup>, Jennifer H. Milbank<sup>1</sup>, Choli Lee<sup>1</sup>, Melissa  
5 D. Zhang<sup>1</sup>, Darren A. Cusanovich<sup>1</sup>, Jay Shendure<sup>1,2.#</sup>

6  
7 <sup>1</sup>*Department of Genome Sciences, University of Washington, Seattle, WA, USA.*

8 <sup>2</sup>*Howard Hughes Medical Institute, Seattle, WA, USA.*

9

10 \*These authors contributed equally to this work.

11

12 #Correspondence to [shendure@uw.edu](mailto:shendure@uw.edu) (J.S.) and [gasperim@uw.edu](mailto:gasperim@uw.edu) (M.G.)

13

14 **Keywords**

15

16 non-coding, CRISPR screen, deletion, genome editing, gene regulation, Mendelian, Lesch-Nyhan

17

18 **Abstract**

19

20 The extent to which distal non-coding mutations contribute to Mendelian disease remains a major  
21 unknown in human genetics. Given that a gene's *in vivo* function can be appropriately modeled *in vitro*,  
22 CRISPR/Cas9 genome editing enables the large-scale perturbation of distal non-coding regions to identify  
23 functional elements in their native context. However, early attempts at such screens have relied on one  
24 individual guide RNA (gRNA) per cell, resulting in sparse mutagenesis with minimal redundancy across  
25 regions of interest. To address this, we developed a system that uses pairs of gRNAs to program  
26 thousands of kilobase-scale deletions that scan across a targeted region in a tiling fashion ("ScanDel"). As  
27 a proof-of-concept, we applied ScanDel to program 4,342 overlapping 1- and 2- kilobase (Kb) deletions  
28 that tile a 206 Kb region centered on *HPRT1*, the gene underlying Lesch-Nyhan syndrome, with median  
29 27-fold redundancy per base. Programmed deletions were functionally assayed by selecting for loss of  
30 *HPRT1* function with 6-thioguanine. *HPRT1* exons served as positive controls, and all were successfully  
31 identified as functionally critical by the screen. Remarkably, *HPRT1* function appeared robust to deletion  
32 of any intergenic or deeply intronic non-coding region across the 206 Kb locus, indicating that proximal  
33 regulatory sequences are sufficient for its expression. A sparser mutagenesis screen of the same 206 Kb  
34 with individual gRNAs also failed to identify critical distal regulatory elements. Although our screen did  
35 find programmed deletions and individual gRNAs with putative functional consequences that targeted  
36 exon-proximal non-coding sequences (*e.g.* the promoter), long-read sequencing revealed that this signal  
37 was driven almost entirely by rare, unexpected deletions that extended into exonic sequence. These  
38 targeted validation experiments defined a small region surrounding the transcriptional start site as the only  
39 non-coding sequence essential to *HPRT1* function. Overall, our results suggest that distal regulatory  
40 elements are not critical for *HPRT1* expression, and underscore the necessity of comprehensive edited-  
41 locus genotyping for validating the results of CRISPR screens. The application of ScanDel to additional  
42 loci will enable more insight into the extent to which the disruption of distal non-coding elements  
43 contributes to Mendelian diseases. In addition, dense, redundant, large-scale deletion scanning with  
44 gRNA pairs will facilitate a deeper understanding of endogenous gene regulation in the human genome.

45

## 46 **Introduction**

47  
48 The success of human genetics in identifying the genes and mutations underlying Mendelian diseases has  
49 been facilitated by the incontrovertible reality that the majority of causal mutations lie in protein-coding  
50 sequences or splice junctions. Indeed, this assumption is explicit in both classic and contemporary  
51 practices in genetics (*e.g.* exome sequencing). However, it is clear that distal non-coding mutations make  
52 *some* contribution to Mendelian disease. Understanding how often non-coding mutations play a causal  
53 role, as well as developing best practices for pinpointing those that do, are critical challenges for the field.  
54 For example, in the clinic, even if a patient is diagnosed with a monogenic Mendelian disorder on the  
55 basis of phenotype, clinical sequencing mainly of coding regions fails to identify a causal mutation ~10%  
56 of the time (Chong et al., 2015). However, possible explanations include not only distal non-coding  
57 mutations, but also misdiagnosis, somatic mutation, technical false negatives, and others.

58  
59 The picture is very different for the genetics of common disease, where over 90% of disease-associated  
60 SNPs fall in non-coding regions (Maurano et al., 2012). Many resources have been developed to predict  
61 the location of putative regulatory elements and the effects of regulatory mutations (Ernst & Kellis, 2012;  
62 Hoffman et al., 2012; Kircher et al., 2014), with ~88% of all protein-coding genes tied to a *cis*-expression  
63 quantitative locus (eQTL, Aguet et al., 2016), ~80% of the genome annotated with biochemical function  
64 (ENCODE Project Consortium et al., 2012), and numerous tools to link regulatory elements to their target  
65 genes (Boyle et al., 2012; Coetzee, Rhie, Berman, Coetzee, & Noushmehr, 2012; Li, Wang, Xia, Sham, &  
66 Wang, 2013; Ward & Kellis, 2012). However, the vast majority of these predictions are either  
67 confounded (*e.g.* for *cis*-eQTLs, by linkage disequilibrium) or lack functional validation. Indeed, there are  
68 few distal non-coding regulatory elements that we can confidently assign to a target gene, or for which we  
69 understand the consequences of disruption.

70  
71 Large-scale functional experiments are clearly an important next step for both common disease genetics  
72 (to facilitate the identification of causal regulatory variants and their target genes) and rare disease  
73 genetics (to identify distal regulatory elements for Mendelian disease genes where causal non-coding  
74 mutations might be found). Within the last year, several studies have used CRISPR/Cas9 genome editing  
75 in cell-based screens to introduce and functionally assay large numbers of non-coding mutations at an  
76 unprecedented scale (Canver et al., 2015; Chen et al., 2015; Diao et al., 2016; Korkmaz et al., 2016;  
77 Rajagopal et al., 2016; Sanjana et al., 2016). The common approach of these studies is to introduce  
78 complex libraries of guide RNAs (gRNAs) via lentiviral infection to a population of cells at a low  
79 multiplicity of infection (MOI), followed by an assay that queries the function or expression of a gene of  
80 interest. CRISPR/Cas9 mediates double-stranded breaks at sites specified by the gRNA in each cell,  
81 eventually resulting in a mutation at each targeted site via imperfect non-homologous end joining  
82 (NHEJ). A fundamental limitation of these singleton gRNA screens is that because of design constraints  
83 (*e.g.* the uneven distribution of protospacer adjacent motif (PAM) sequences, the variable efficiency of  
84 gRNAs, and others), the resulting coverage of regions of interest is incomplete and uneven. As the  
85 majority of bases will be perturbed by zero or only one gRNA, these studies rely on the aggregate  
86 behavior of clusters of target sites within potential regulatory elements (Canver et al., 2015) or arbitrarily  
87 sized windows (*e.g.*, 500 base-pairs) (Sanjana et al., 2016), rather than redundant targeting of each base-  
88 pair (bp) by independent gRNAs. Furthermore, it is possible that the mutations introduced by NHEJ at  
89 single sites (highly heterogeneous but mainly dominated by small 1-10 bp deletions (McKenna et al.,  
90 2016; Tsai et al., 2014)) are insufficient to fully disrupt many regulatory elements.

91  
92 Here we sought to overcome these weaknesses by introducing *pairs* of gRNAs to each cell, with the goal  
93 of inducing a kilobase-scale deletion of the intervening DNA between two programmed cuts. A principal  
94 advantage of this method is that by tiling deletions across a region, each targeted base-pair can be covered  
95 with high redundancy (scanning deletion or “ScanDel”). Furthermore, kilobase-scale deletions are much  
96 more likely to eliminate the function of an overlapping or fully contained regulatory element, relative to

97 small indels resulting from NHEJ at a single target site. Our approach is analogous to classic deletion  
98 scanning experiments (Reid, Gregg, Smithies, & Koller, 1990; Rincon-Limas & Krueger, 1991), but with  
99 advantages in throughput and of targeting much larger regions in the endogenous genome rather than  
100 sequences cloned to a plasmid.

101  
102 Adopting the framework of genome-wide CRISPR/Cas9 screens, we synthesized, cloned, and lentivirally  
103 delivered thousands of programmed gRNA pairs to cells at a low MOI. Each gRNA pair targets nearby  
104 sites, effectively leveraging CRISPR/Cas9's ability to generate kilobase-scale deletions when NHEJ-  
105 mediated repair of two nearby double-stranded breaks results in excision of the intervening DNA  
106 segment. In total, we designed and introduced gRNAs pairs programming 4,342 overlapping ~1- and ~2-  
107 kilobase (Kb) deletions that tiled a 206 Kb region centered on *HPRT1*, the gene underlying the X-linked  
108 Mendelian disorder Lesch-Nyhan syndrome. 6-thioguanine (6TG) was used to select for cells that had lost  
109 *HPRT1* function. By quantifying gRNA pairs both before and after 6TG selection, we were able to  
110 identify programmed deletions that significantly compromised *HPRT1* expression or function.

## 111 112 **Results**

### 113 114 **Development of ScanDel**

115  
116 In genome-wide CRISPR/Cas9 screens, a gRNA library is lentivirally delivered to a large pool of cells at  
117 a low MOI, such that each infected cell is likely to receive only one gRNA (Shalem et al., 2014; Wang,  
118 Wei, Sabatini, & Lander, 2014; Zhou et al., 2014). Each gRNA induces NHEJ-mediated indels centered  
119 at the Cas9-mediated cleavage position within the target sequence, with the goal of perturbing the  
120 function of the targeted locus. However, given the small and variable length of indels, the robustness of  
121 perturbation is inherently limited, particularly when targeting non-coding sequences in which frameshifts  
122 are irrelevant. To instead program a kilobase-scale deletion in each cell, we devised the following  
123 approach (**Fig. 1**). First, gRNA pairs are designed to program specific deletions (with each gRNA  
124 specifying one of the deletion's boundaries, **Fig. 1A**), and the corresponding pairs of 20 bp spacers are  
125 synthesized *in cis* on a microarray (**Fig. 1B**). Second, the paired spacers are inserted into the lentiGuide-  
126 Puro plasmid between the U6 promoter and the gRNA backbone. Third, a second gRNA backbone and a  
127 second RNA Polymerase (Pol) III promoter (H1 or U6) are inserted between the paired spacers. Fourth,  
128 libraries of "gRNA pairs" are lentivirally delivered to a large pool of cells at a low MOI, such that each  
129 cell receives a pair of gRNAs that programs a single deletion (**Fig. 1C**). Finally, analogous to  
130 conventional genome-wide CRISPR/Cas9 screens, deep sequencing of the integrated gRNA pairs is used  
131 as a surrogate measure of the prevalence of each programmed deletion in a population of cells (*e.g.* before  
132 and after the cells have been subjected to functional selection) thus capturing the phenotypic  
133 consequences of individual deletions.

134  
135 As an initial test of our paired guide system, we compared the efficacy of using two different promoters  
136 for the two guides (a 'U6-H1' system) versus using two copies of the same promoter ('U6-U6'). We  
137 tested these lentiviral gRNA pair expression constructs by targeting the same genomic site for deletion  
138 with each system (**Supplementary Fig. 1**). PCR amplification of the site was performed with unique  
139 molecular identifiers (UMIs) in order to minimize biases related to amplicon size (see **Methods**). The U6-  
140 H1 system induced more programmed deletions than the U6-U6 system (20% vs. 10% of reads from cells  
141 one week after transduction). The U6-H1 system has several advantages (*e.g.* avoiding recombination  
142 between the two U6 promoters during cloning; unique primer design for deep sequencing of each gRNA),  
143 and we therefore proceeded with it.

144  
145 An important caveat for ScanDel, relative to conventional gRNA cell-based screens, is that deletions  
146 programmed by gRNA pairs only occur in a minority of cells (Byrne, Ortiz, Mali, Aach, & Church, 2015;  
147 Canver et al., 2014), with the other major outcomes being small NHEJ-mediated indels at one or both

148 gRNA-targeted sites. For example, in our test of the U6-H1 system, 32% of edited cells contained the  
149 programmed deletion, while the remainder were mutated at one or both gRNA-targeted sites but retained  
150 the intervening sequence. While this complicates interpretation, the problem can be overcome by using a  
151 robust functional assay in conjunction with multiple, independent gRNA pairs that query the same  
152 genomic region, as well as by including unpaired gRNA controls to ensure that observed effects do not  
153 occur with individual gRNAs (but rather are dependent on the presence of both gRNAs).

154

### 155 **Application of ScanDel to survey a 206 Kb region surrounding *HPRT1***

156

157 With the goal of investigating the potential of non-coding mutations to compromise its function, we  
158 applied ScanDel to a 206 Kb region on the X chromosome centered on the *HPRT1* gene (**Fig. 1A & 2A**).  
159 *HPRT1* is a broadly expressed housekeeping gene that encodes the enzyme hypoxanthine(-guanine)  
160 phosphoribosyltransferase (HPRT). Loss-of-function mutations in *HPRT1* result in Lesch-Nyhan  
161 syndrome (Lesch & Nyhan, 1964), in which a minority of patients present with reduced HPRT enzymatic  
162 activity despite the absence of coding mutations (Fu et al., 2014). Such individuals could carry  
163 unidentified non-coding mutations that result in reduced *HPRT1* expression. Loss of *HPRT1* also causes  
164 resistance to the drug 6TG, a purine analog and chemotherapeutic agent. Thus, it is straightforward to  
165 assay cell populations for loss of *HPRT1* function, as only cells with highly reduced expression of  
166 functional HPRT will survive selection by 6TG (**Fig. 1C**).

167

168 We designed pairs of gRNAs that programmed deletions tiling across the 206 Kb region, including tiles  
169 that overlapped *HPRT1* exons in order to allow coding regions to serve as positive controls. As deletion  
170 length has been shown to affect deletion rate (Canver et al., 2014), deletions were programmed to be  
171 consistently either ~1 or ~2 Kb in length (**Fig. 1A**). This design resulted in 4,342-programmed deletions  
172 that tiled across the region, collectively covering each base-pair a median of 27 times (**Fig. 2B**). Testing  
173 each base-pair with numerous independently programmed, tiling deletions is expected to reduce noise and  
174 also increase resolution (as all successfully made deletions tiling a critical regulatory element should  
175 exhibit positive selection). However, to guard against the possibility that individual gRNAs' effects could  
176 confound analysis (*e.g.* via off-target mutations, or on-target small ~10 bp indels), we also included all  
177 spacers in the library as pairs with themselves ('self-pairs'; **Fig. 1B inset, Supplementary Fig. 2**).  
178 Additionally, we included 330 negative control gRNA pairs not expected to survive 6TG selection, as  
179 they program deletions in non-genic regions far from *HPRT1* or use spacers made of random sequence  
180 not present in the reference genome (hg19).

181

182 The gRNA pair library was array-synthesized, cloned, and delivered via lentiviral infection to HAP1 cells  
183 in replicate (**Fig. 1B, C**). Cell populations were sampled before and after one week of 6TG selection, with  
184 PCR amplification and deep sequencing of gRNA pairs to quantify abundance at each time-point. The  
185 functional selection score was calculated as the log<sub>10</sub> ratio of normalized read counts after selection  
186 relative to before 6TG treatment ("selection score" as log<sub>10</sub>(after/before 6TG)). Positively scoring self-  
187 paired spacers were flagged, and gRNA pairs that used these flagged spacers were excluded from further  
188 analysis (11% of pairs in replicate 1 and 3% of pairs in replicate 2). To integrate signal from overlapping  
189 programmed deletions, we calculated a "per base-pair" metric as the mean of selection scores of all  
190 deletions overlapping a given base (**Fig. 2D, Methods**). This per base-pair score across the *HPRT1* locus  
191 was well-correlated between biological replicates (Pearson: 0.708; **Supplementary Fig. 3**). Importantly,  
192 none of the negative-control gRNA pairs that were sampled in each of the two replicates were positively  
193 selected in both experiments (**Supplementary Fig. 4**).

194

195 All *HPRT1* exons exhibited strong functional scores, confirming the sensitivity of ScanDel as applied  
196 here to detect sequences essential to *HPRT1* function (**Supplementary Fig. 5**). However, all of the  
197 reproducibly positive non-coding signal across the 206 Kb region was immediately proximal to an

198 *HPRT1* exon. This result suggests that there is no distal regulatory element in the 206 Kb region that is  
199 essential to *HPRT1* expression in HAP1 cells.

200  
201 Near exons, non-coding regions exhibiting positive signal did so even when deletions that also overlapped  
202 the exons themselves were excluded from the analysis (**Supplementary Fig. 5D**). This suggested the  
203 presence of essential, proximal regulatory sequences. We noted that the positively scoring regions  
204 immediately upstream and downstream of the first exon overlapped with a region of open chromatin  
205 identified by performing ATAC-seq in HAP1 cells, supporting the region's role in gene regulation (**Fig.**  
206 **2C, Supplementary Fig. 5A**). This observation motivated us to attempt validation experiments for this  
207 region, with the goal of directly confirming which deletions of putative regulatory elements were  
208 impairing *HPRT1* function (**Fig. 3A, E**).

209

### 210 **Direct genotyping of deletions that survive functional selection**

211

212 With the goal of first validating the positive signal upstream of the first exon, we repeated the experiment  
213 with a small pool of 4 gRNA pairs targeting the putative *HPRT1* promoter (**Fig. 3B**). We then amplified 3  
214 Kb of this region by PCR and performed long-read sequencing of the amplicons (Pacific Biosciences). As  
215 expected, before 6TG selection, the programmed deletions were all well-represented in the population,  
216 although deletions with boundaries deviating from Cas9 cut sites (*i.e.* 'unprogrammed') were also  
217 detected (**Fig. 3C**). However, after selection on 6TG, deletions with unprogrammed boundaries  
218 predominated, including those unseen before 6TG, and that overwhelmingly extend beyond the  
219 transcriptional start site (TSS) (**Fig. 3D**). The fact that these initially rare deletions were strongly selected  
220 (while 2 Kb promoter deletions that did not cross the TSS were not) suggests that even relatively  
221 proximal sequences upstream of the *HPRT1* TSS are not strictly essential for expression. Based on  
222 the results of these validation experiments, we conclude that only a narrow window of non-coding sequence  
223 upstream of the TSS and 5'UTR is likely relevant to the regulation of *HPRT1* expression.

224

225 We next sought to validate the positive signal downstream of the first exon. To do so, we again repeated  
226 the experiment with a small pool of just 5 gRNA pairs targeting the first ~2.7 Kb of intron 1 (**Fig. 3F**).  
227 We then amplified the region and again performed long-read sequencing of the amplicons (Pacific  
228 Biosciences). As with the promoter, the programmed deletions were all well-represented before 6TG  
229 selection, although deletions with unprogrammed boundaries are also detected at a low rate (**Fig. 3G**).  
230 After selection, deletions with unprogrammed boundaries predominated again, particularly those that  
231 extended into the first exon, thereby disrupting coding sequences (**Fig. 3H**). A low rate of non-exonic  
232 deletions survived post-6TG, but these were present at the same level as unedited reads, implying that  
233 there may be some other explanation for 6TG resistance in these cells. Thus, as with the promoter, the  
234 positive signals that we originally observed for deletions in the first intron were likely consequent to the  
235 positive selection of rare 'on-target-but-with-incorrect-boundaries' deletions that extend into the first  
236 *HPRT1* exon.

237

### 238 **An individual gRNA screen of the same region for comparison to ScanDel**

239

240 We next compared our ScanDel results against a more conventional screen relying on only individual  
241 gRNAs (Canver et al., 2015; Chen et al., 2015; Diao et al., 2016; Korkmaz et al., 2016; Sanjana et al.,  
242 2016) (**Fig. 2E**). For this, we cloned a second lentiviral library consisting of 12,151 individual gRNAs  
243 targeting the same 206 Kb region and assayed *HPRT1* function in HAP1 cells as previously. Under the  
244 assumption that each individual gRNA potentially disrupts a ~10 bp region, this experiment at best  
245 interrogates ~70% of bases within the 206 Kb region due to the sparsity of PAM sites (as compared to our  
246 coverage of the entire locus at median ~27-fold redundancy per base-pair with ScanDel). 85.7% of exon-  
247 targeting gRNAs were positively selected (**Supplementary Fig. 5**) and exonic selection scores were well  
248 correlated between biological replicates (Pearson: 0.781). Of 612 negative control gRNAs, none that were

249 sampled in each replicate were positively selected in both experiments (**Supplementary Fig. 6**). In non-  
250 coding sequence, scores were poorly correlated between biological replicates, with a paucity of  
251 reproducible, positively selected signal (Pearson: 0.156, **Supplementary Fig. 7**).

252  
253 Notably, we did observe a greater proportion of positively scoring gRNAs in the vicinity of exons – *i.e.*  
254 whereas only 2% of intergenic gRNAs were positively selected, 7.5% of deep intronic (>2 Kb away from  
255 an exon boundary) and 20.5% of proximal intronic (<2 Kb from an exon boundary) gRNAs were  
256 positively selected (**Fig. 4A**). Given our earlier observation with ScanDel of rare, ‘on-target-but-with-  
257 incorrect-boundaries’ that were confounding when targeting near exon boundaries, we next performed  
258 similar validation experiments on individual gRNAs that targeted non-coding sequences nearby exons  
259 (**Fig. 4B**). We chose 10 gRNAs in the *HPRT1* promoter region (**Fig. 4C**), and repeated the individual  
260 gRNA experiment with a small pool of just these 10 gRNAs, again using long reads (Pacific Biosciences)  
261 to sequence the locus before (**Fig. 4D**) and after 6TG selection (**Fig. 4E**). Similar to our results with  
262 ScanDel in this region, the only mutations that survived 6TG selection were initially rare deletions whose  
263 boundaries extended past the TSS and into the 5’ UTR and/or coding sequence (**Fig. 4D**). This result  
264 strongly underscores that caution should be exercised in the interpretation of results from CRISPR-based  
265 screens of non-coding regions, whether performed with individual gRNAs or gRNA pairs, and the  
266 importance of sequence-based validation of edited regions in the context of such screens.

## 267 268 **Discussion**

269  
270 We describe a method that uses CRISPR/Cas9 and pairs of gRNAs to experimentally test the functional  
271 consequences of thousands of programmed, kilobase-scale genomic deletions in a single experiment. In  
272 this proof-of-concept, we introduced a set of densely tiling deletions spanning a 206 Kb region centered  
273 on the Mendelian disease gene *HPRT1*, and found no evidence for any distal regulatory element that is  
274 critical for its activity, as measured by 6TG sensitivity in HAP1 cells. A screen of this same region with  
275 individual gRNAs supported this finding. The dearth of positive selection from disruption of non-coding  
276 regions contrasts with the strong positive selection observed from disruption of any exon of *HPRT1*,  
277 either by programmed deletions or individual guides. This result is consistent with the relatively small  
278 fraction of Lesch-Nyhan patients (0.4%) whose cases go unresolved by clinical sequencing of coding  
279 regions (Fu et al., 2014).

280  
281 *HPRT1* is a widely expressed housekeeping gene (Ardlie et al., 2015) with no eQTLs identified by the  
282 Genotype-Tissue Expression Project (Aguet et al., 2016). The simplest explanation of our results is that  
283 sequences immediately proximal to the *HPRT1* transcriptional start site may be sufficient to confer the  
284 level of expression that provides sensitivity to 6TG, such that even if we disrupt distal regulatory  
285 elements that subtly modulate expression, they would go undetected by our strong selection. For future  
286 applications of ScanDel, implementing more quantitative readouts will be critical. For example, ScanDel  
287 is compatible with any functional selection that reliably separates cells on the basis of gene expression  
288 (*e.g.* knocking in GFP to a locus of interest, and then using FACS to stratify ScanDel-edited cells on the  
289 basis of expression).

290  
291 Another possibility, albeit an unlikely one, is that critical regulatory elements for *HPRT1* lie outside of  
292 the 206 Kb window that we surveyed. For example, the gene resides at the terminus of a ~300 Kb  
293 topologically associated domain identified in HAP1 cells that spans ~185 Kb beyond our interrogated  
294 region (Sanborn et al., 2015) (**Supplementary Fig. 8**). This could potentially be addressed by increasing  
295 the complexity of the library of programmed deletions in order to densely tile a larger region, or by  
296 simply increasing the size of each programmed deletion to interrogate more sequence per gRNA pair.

297  
298 We note that the paucity of regulatory sequences discovered by CRISPR/Cas9-based screening is not  
299 exclusive to this study. Collectively, individual gRNA CRISPR/Cas9 screens have surveyed over a

300 megabase of prioritized non-coding sequences, but only a handful of gRNAs tested have robust  
301 phenotypic effects that validate (Canver et al., 2015; Diao et al., 2016; Korkmaz et al., 2016; Rajagopal et  
302 al., 2016; Sanjana et al., 2016). One explanation is that the assays being used are insufficiently sensitive  
303 and fail to detect modest regulatory effects. This could be addressed through the implementation of more  
304 quantitative assays.

305  
306 A second explanation is that as implemented, genome editing has poor sensitivity due to redundancy in  
307 mammalian gene regulation. Redundancy of transcription factor binding sites within enhancers could  
308 prevent ~1-10 bp indels introduced by individual gRNAs from sufficiently disrupting function. Indeed,  
309 this was part of the motivation for developing ScanDel, whose programmable kilobase-scale deletions  
310 exceed the size of enhancers. Although we did not identify distal enhancers, the essentiality of the TSS  
311 and portions of the 5'UTR in our assay was detected primarily by deletions substantially larger than 1-10  
312 bp (**Fig. 4D, E**), suggesting paired gRNA libraries will be effective for enhancing sensitivity.

313  
314 A third explanation is that gene expression levels depend in part on historical events, such that disruption  
315 of an enhancer in a differentiated cell line would not result in the same outcome as disrupting the same  
316 enhancer prior to differentiation. This could be potentially addressed by performing lentivirally-mediated  
317 genome editing steps in stem cells, followed by differentiation to a cell type of interest. Any differences  
318 in functional consequences that are dependent on the timing of mutation would be of great interest.

319  
320 Our results also provide a cautionary example of the importance of validation by direct genotyping in the  
321 context of CRISPR/Cas9-based screens of non-coding sequences. NHEJ generates a wide assortment of  
322 mutations, and strong selections may recover rare editing outcomes. For example, whereas targeting  
323 regions adjacent to exons might have been interpreted to reflect the presence of critical proximal  
324 regulatory elements, validation experiments using a long-read sequencer showed that this signal was  
325 caused by rare deletions that extended into exonic sequence. Many of these unexpected events would  
326 have been difficult to detect had we been relying solely on a short-read sequencing platform to genotype  
327 editing outcomes. Additionally, validating CRISPR/Cas9-based screens by assessing selection for specific  
328 edited haplotypes adds biological information. Here, with long-read genotyping we were able to identify a  
329 set of variable deletions that either did or did not drive selection, thus enabling discrimination of essential  
330 elements at higher resolution (**Fig. 3C, D**).

331  
332 We also note that in experiments relying on pairs (or more) of gRNAs to program deletions, it is critical  
333 to include controls that quantify the effects of the individual gRNAs comprising these pairs, as these can  
334 have direct effects or off-target effects that might be misinterpreted as being consequent to the  
335 programmed deletion. While this manuscript was in preparation, a study was published that similarly used  
336 gRNA pairs to program deletion of a large number of lncRNAs, followed by phenotyping for cellular  
337 growth (Zhu et al., 2016). Although the results are of great interest, these important controls were not  
338 included for the vast majority of spacers used. It will also be important to confirm the validity of each of  
339 this screen's findings through direct genotyping.

340  
341 Even with the aforementioned open questions and remaining technical hurdles, it is critical that we  
342 continue to advance and apply methods for multiplex perturbation of the regulatory landscape with  
343 genome editing. The importance of experimental perturbation is highlighted by our results. The non-  
344 coding region surrounding *HPRT1*'s first exon resides in open chromatin in this cell line (**Fig. 2,**  
345 **Supplementary Fig. 5**), yet our results with ScanDel and subsequent validation experiments indicate the  
346 essential regulatory region is only a small part of the broader ATAC-seq peak. Perturbing the endogenous  
347 genome represents a highly complementary approach to the more classic strategy of reporter assays  
348 (Banerji, Rusconi, & Schaffner, 1981; Patwardhan et al., 2009), in which short sequences are tested for  
349 their regulatory potential on an episomal vector (of note, the results of early reporter assay-based tests of  
350 potential regulatory sequences flanking *HPRT1* are consistent with our findings (Reid et al., 1990;

351 Rincon-Limas & Krueger, 1991)). Indeed, the ongoing challenge that genome editing can address is to  
352 understand how short sequences with regulatory potential coordinate with one another across endogenous  
353 loci to give rise to specific levels of expression.

354  
355 In summary, ScanDel enables the multiplex characterization of the functional consequences of thousands  
356 of programmed, kilobase-scale deletions to the endogenous genome in a single experiment. We applied  
357 ScanDel to *HPRT1*, a housekeeping gene in which disruptive mutations cause Lesch-Nyhan syndrome,  
358 introducing densely tiled 1-2 Kb deletions across a 206 Kb region encompassing the gene, covering each  
359 base-pair with median ~27-fold redundancy. Our results demonstrate the absence of distal *cis*-regulatory  
360 elements in this region that are critical for *HPRT1* expression. In the future, we anticipate that large-scale  
361 perturbation of putative regulatory elements in their endogenous context with methods such as ScanDel  
362 will provide further insights into gene regulation and the contribution of non-coding mutations to human  
363 disease.  
364





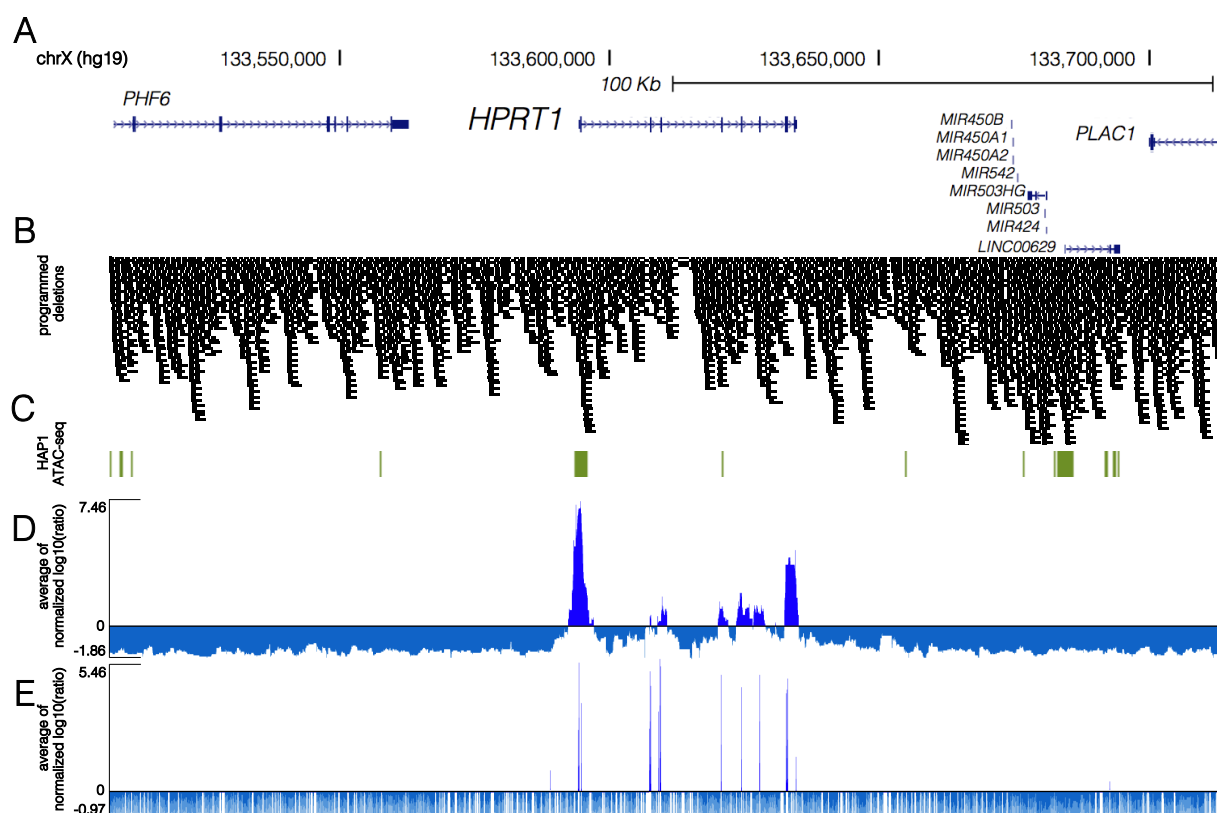

388  
 389 **Figure 2. High coverage ScanDel library across the *HPRT1* locus reveals a paucity of critical distal**  
 390 **regulatory elements.** **A)** Deletions were programmed across 206.1 Kb of the *HPRT1* locus and its  
 391 surrounding sequence (chrX:133,507,694-133,713,798, hg19, UCSC Genes track in blue). Disruption of  
 392 *HPRT1* causes Lesch-Nyhan, a neurogenetic Mendelian disorder. **B)** A total of 4,342 1 Kb or 2 Kb  
 393 deletions were programmed (see **Fig. 1A**), tiling across the locus such that each base-pair was  
 394 interrogated by a median of 27 independently programmed deletions. A high density of repeat elements  
 395 results in reduced coverage of a region within *HPRT1*'s intron 3. Deletions are visualized as black bars  
 396 spanning the gRNA pair's programmed cut sites. **C)** HAP1 ATAC-seq hotspots (green) indicate regions  
 397 of open chromatin in the cell line. Of note, a hotspot extends 600 bp upstream and 1.6 Kb downstream of  
 398 exon 1. **D)** ScanDel scores were assigned to each base-pair as the average of all selection scores  
 399 ( $\log_{10}(\text{after}/\text{before})$ ) for gRNA pairs that programmed deletions that span that base-pair (**Methods**). If a  
 400 gRNA pair used a spacer that was positively selected on its own as a self-pair, the gRNA pair was  
 401 removed from analysis. Given that depleted gRNAs are usually completely absent after 6TG, their  
 402 negative scores are of arbitrary negative magnitude. To avoid over-weighting negative values, a minimum  
 403 score was determined from each replicate's gRNA pair score distribution (**Supplementary Fig. 9**), and  
 404 scores below it were set at this minimum. For each biological replicate, the base-pair's score was  
 405 normalized to the replicate's median of positive scores. The average of the two biological replicates'  
 406 normalized scores for that base-pair is displayed, with positive scores in royal blue and negative scores in  
 407 blue-grey. **E)** An individual gRNA mutagenesis screen of the same region was also performed covering  
 408 only  $\sim 70\%$  of bases in the region due to the sparsity of high-quality designable spacers. Individual base-  
 409 pairs were scored based on nearby cut-sites, under the assumption that each gRNA queries a  $\sim 10$  bp  
 410 region. The plotted scores were calculated as in **D**, with positive scores in royal blue and negative scores  
 411 in blue-grey.

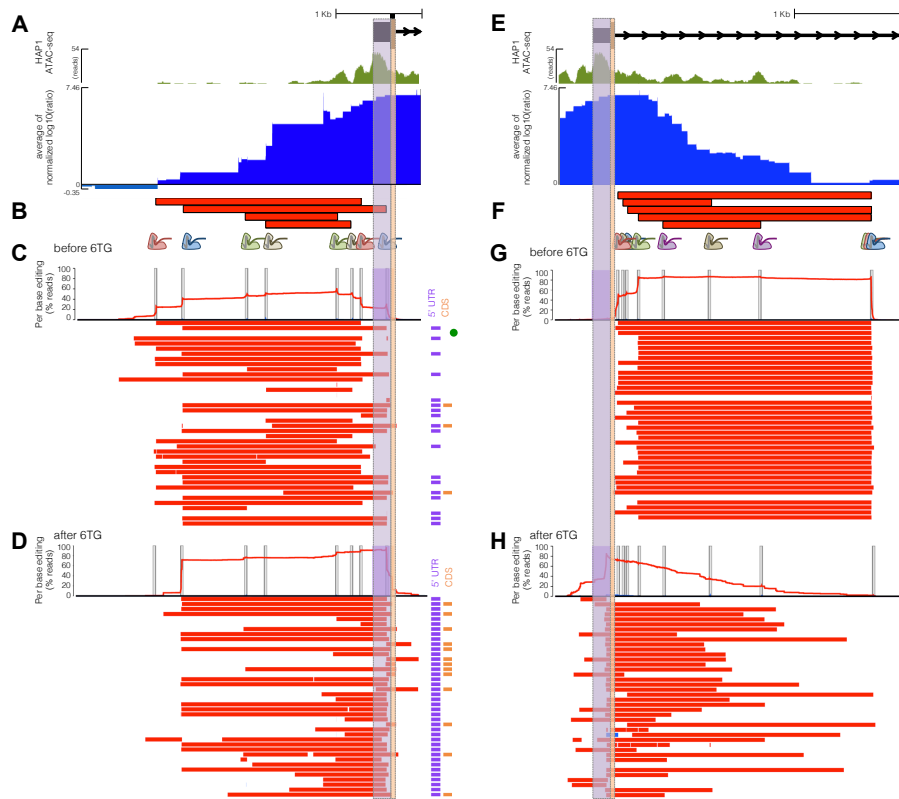

412  
413 **Figure 3. Long-read sequencing of edits derived from exon-proximal ScanDel gRNA pairs reveals**  
414 **rare, unprogrammed, exon-interrupting deletions that drive selective effects.** **A)** A putative promoter  
415 is implicated by open chromatin (HAP1 ATAC-seq broad peaks, green) surrounding *HPRT1*'s first exon  
416 (UCSC Genes, black). ScanDel signal in the 2 Kb upstream of *HPRT1* also suggests the possibility of  
417 critical regulatory sequences in this region (blue as in **Fig. 2D**, chrX:133,591,603-133,594,626, hg19).  
418 The 5' UTR and coding regions of exon 1 are highlighted in purple and orange, respectively. **B)** Four  
419 gRNA pairs targeting the promoter were cloned as a small pool, delivered, and selected with 6TG to  
420 enable sequencing of the edited locus (programmed deletions displayed as red bars). A 3 Kb region was  
421 amplified and sequenced with long reads (Pacific Biosciences). **C)** The chart at the top displays per-base  
422 %s for deletions (red) or insertions (blue), with target sites indicated by vertical gray bars. Horizontal bars  
423 show the edits found on each haplotype (red: deletions; blue: insertions; ranked by decreasing  
424 prevalence). All programmed deletions are abundant before 6TG treatment, in addition to rare,  
425 unexpected deletions. The notations to the right indicate if the edits interrupt the TSS/5'UTR (purple bar)  
426 and/or coding sequence (orange bar). The unedited haplotype is marked with a green dot. Of note, PCR  
427 and sequencing on the PacBio RSII are biased towards smaller fragments, limiting accurate quantitative  
428 comparison of read counts from differently sized edits. **D)** Haplotypes from 6TG-selected cells are plotted  
429 as in **C**, revealing that only edits that interrupt the TSS/5'UTR survive selection, with no programmed or  
430 'promoter only' deletions surviving selection. **E)** Open chromatin (green, as in **A**) and ScanDel signal  
431 suggests the presence of critical non-coding regulatory sequences in the first ~2.7 Kb of intron 1  
432 (chrX:133,593,871-133,596,998, hg19). **F)** 5 gRNA pairs that drove the signal in this intronic region were  
433 cloned and 6TG selected as a small pool, as in **C**. **G)** A 3.1 Kb region spanning the 5'-most part of intron  
434 1 was amplified and sequenced from cells sampled before 6TG selection. Haplotypes and per-base editing  
435 rates are diagrammed as in **C**. **H)** Post-6TG selection haplotypes from the intron 1-targeted cells are  
436 plotted as in **G**, revealing that the vast majority of surviving edits disrupt the exon. Two edited haplotypes  
437 do not interfere with the exon, but these are present at approximately the level of unedited haplotypes,  
438 suggesting 6TG resistance in these cells is caused by mutations elsewhere.

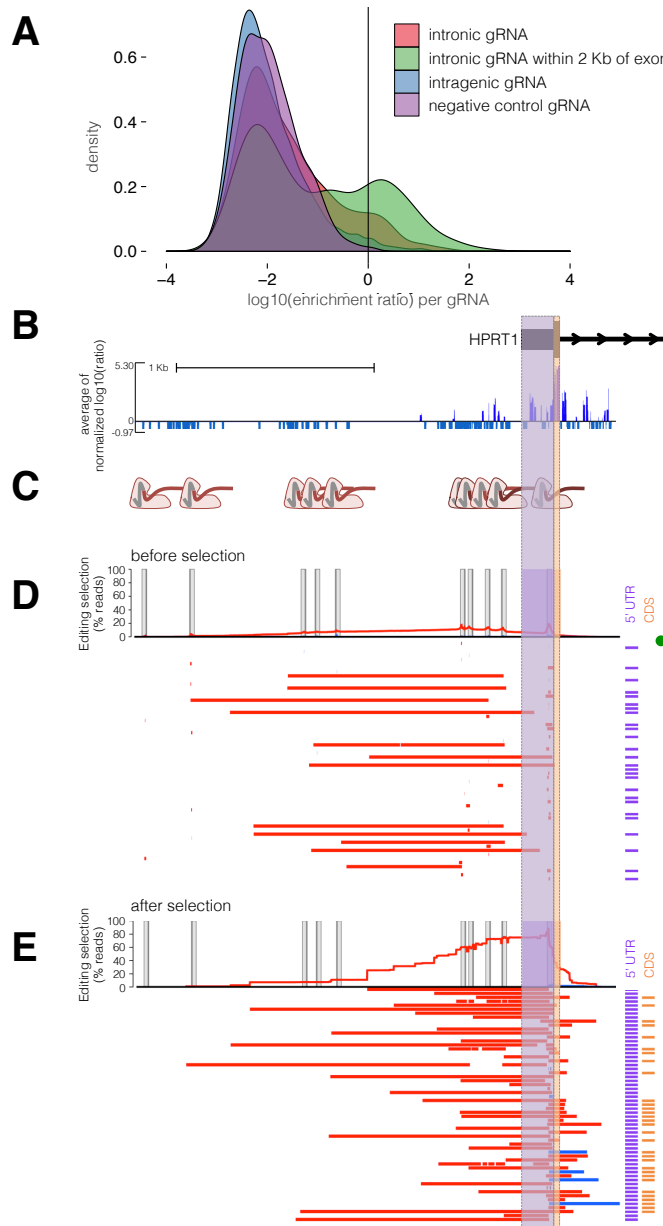

439  
 440 **Figure 4. Direct genotyping of edits from an individual gRNA mutagenesis screen also reveals rare,**  
 441 **unexpected edits that disrupt *HPRT1*'s exon 1.** **A)** A greater proportion of gRNAs targeting non-coding  
 442 sequence within 2 Kb of exons were positively selected in an individual gRNA screen across the *HPRT1*  
 443 locus (**Fig. 2E**, data shown from replicate 1). Each gRNA was assigned a score equal to the  
 444  $\log_{10}(\text{after}/\text{before } 6\text{TG})$ . **B)** gRNAs that target upstream of the transcriptional start site are positively  
 445 selected. The 2.4 Kb region sequenced for genotype validation (chrX:133,592,240-133,594,646, hg19),  
 446 *i.e.* a zoom-in of data shown for the whole region in **Fig. 2E**. **C)** For validation, 10 gRNAs in this 2.4 Kb  
 447 promoter region were cloned into a low complexity library, delivered to HAP1 cells expressing Cas9, and  
 448 selected with 6TG. After selection, the 2.4 Kb promoter region was amplified for long-read sequencing.  
 449 **D)** Before 6TG selection reads are plotted as in **Fig. 3C**. Briefly, the per-base percentage of haplotypes  
 450 that carried a deletion (red) or insertion (blue) is charted. The edits of the most-prevalent haplotypes from  
 451 long-read sequencing are drawn as colored bars, and the notations to the right indicate if the edits  
 452 interrupt the TSS/5'UTR (purple) or coding sequence (orange) of exon 1. A green dot signifies the  
 453 unedited haplotype. Target site programmed edits are observed and are mainly comprised of the expected

454 small indels, in addition to rarely occurring larger deletions. PCR and sequencing on the PacBio RSII are  
455 biased towards smaller fragments, limiting accuracy of quantitative comparison of the read-count  
456 prevalence of different sized edits. **E)** The most abundant haplotypes from cells after 6TG selection are  
457 visualized as in **D**. Only mutations that interrupt exon 1 survive 6TG selection.  
458

459 **Methods**

460

461 **Tissue culture**

462

463 HAP1 cells were purchased from Horizon Discovery and cultured in Iscove's Modified Dulbecco's  
464 Medium with L-glutamine and 25 mM HEPES (Gibco). HEK293T cells were purchased from ATCC and  
465 cultured in Dulbecco's Modified Eagle's Medium with high glucose and sodium pyruvate  
466 (LifeTechnologies). Both media were supplemented with 10% Fetal Bovine Serum (Rocky Mountain  
467 Biologicals) and 1% Penicillin-Streptomycin (Gibco), and grown with 5% CO<sub>2</sub> at 37° C.

468

469 **gRNA library design**

470

471 To generate a list of gRNAs, we identified all 20 bp protospacers followed by a 5'-NGG PAM sequence  
472 from chrX:133,507,694-133,713,798 (hg19). We then excluded protospacers that had a perfect sequence  
473 match elsewhere in the genome, and scored the remaining gRNAs for both on-target and off-target  
474 activity. We considered off-target sequences that had five or fewer mismatches to the putative gRNA, and  
475 calculated an aggregate off-target score using the method of Hsu et al., 2013 (Hsu et al., 2013). In  
476 addition we scored each site for on-target efficiency (Doench et al., 2016). Final deletion pairs were  
477 matched using spacers that did not contain BsmBI restriction sites and passed filters as described in **Fig.**  
478 **1**. Contrastingly, the individual gRNA library included all of the spacers targeting the same region,  
479 excluding those predicted to have 2,000 or more off-targets or to have off-targets with 4 or fewer  
480 mismatches within the targeted *HPRT1* region.

481

482 **Building the gRNA pair library**

483

484 This library cloning method was developed in parallel to similar recently published methods (Aparicio-  
485 Prat et al., 2015) and is modified from the GeCKO single gRNA cloning scheme (Sanjana et al., 2014;  
486 Shalem et al., 2014). First, the lentiGuide-Puro backbone (Addgene #52963) is digested with BsmBI  
487 (FastDigest Esp3I, Thermo) and gel purified. The paired spacers (flanked with lentiGuide-Puro overlap  
488 sequences) are synthesized twice on a microarray (CustomArray, Inc.) such that each pairing is  
489 represented in both possible orders (**Supplementary Fig. 2**).

490

491 To ensure quality of array synthesis, 1 ng of the oligo pool was amplified with Kapa HiFi Hotstart  
492 ReadyMix (KHF, Kapa Biosystems) and run on a gel to confirm oligos are of the expected 108 bp length.  
493 After PCR purification with Agencourt AMPure XP beads (Beckman Coulter), the amplicon is cloned  
494 into lentiGuide-Puro using In-Fusion HD Cloning Plus (Clontech) and transformed into Stable Competent  
495 *E. coli* (NEB C3040H) to minimize repeat-based recombination of the lentivirus. This ensuing library  
496 (lentiGuide-Puro-2xSpacers) now contains each pair of spacers, but is still missing the additional sgRNA  
497 backbone and PolIII promoter.

498

499 We next cloned in the additional gRNA backbone and H1 promoter between each spacer pairing to enable  
500 expression of the two independent gRNAs. The gRNA backbone-H1 promoter fragment was ordered as a  
501 gBlock (IDT) with flanking BsmBI sites to allow ligation into the BsmBI-digested lentiGuide-Puro-  
502 2xSpacers library. The gBlock and the lentiGuide-Puro-2xSpacers are each digested with BsmBI,  
503 purified, ligated together with Quick Ligase (NEB M2200S), and transformed into Stable Competent *E.*  
504 *coli* to create a final lentiGuide-Puro-2xgRNA library.

505

506 To prevent bottlenecking of the library, these cloning steps are performed with enough replicates at high  
507 efficiency to maintain a minimum of 20x average library coverage (relative to the expected library  
508 complexity). Sequencing of the lentiGuide-Puro-2xgRNA library revealed 97.8% retention of diversity  
509 from the designed paired spacers. However, 16% of library reads held unprogrammed, interswapped

510 pairs. 88.5% of these swaps are only seen in a single read, implying a more likely cause is template  
511 switching during either PCR or cluster generation. For all experimental analysis, only reads of gRNA  
512 pairs that perfectly matched programmed pairs were considered.

#### 513 514 Building the individual gRNA library

515 The spacers of this library were similarly synthesized on an array, amplified, and purified as above. The  
516 lentiGuide-Puro backbone was linearized as above, and the library cloned into it using the NEBuilder  
517 HiFi DNA Assembly Master Mix (NEB). This plasmid was transformed into Stable Competent *E. coli*,  
518 generating enough transformants for 30x average coverage. This method produced 98.5% retention of  
519 complexity from the designed array.

#### 520 521 522 Lentiviral library production, delivery, and 6-thioguanine selection

523  
524 Lentivirus was produced using Lipofectamine 3000 (Life Technologies) to transfect HEK293T with the  
525 lentiviral vector libraries made above and 3rd generation packaging plasmids (pMDLg/pRRE Addgene  
526 12251, pRSV-Rev Addgene 12253, pMD2.G Addgene 12259). Supernatant was collected 72 hours after  
527 transfection, centrifuged at 300 rcf for 5 minutes to remove cell debris, and passed through a 0.45  $\mu\text{m}$   
528 syringe filter.

529  
530 To create a monoclonal HAP1 cell line stably expressing Cas9, HAP1 cells were transduced with  
531 lentivirus produced using lentiCas9-Blast (Addgene 52962), selected with 5  $\mu\text{g}/\text{mL}$  Blasticidin (Thermo  
532 Fisher Scientific), and single-cell sorted via FACS.

533  
534 HAP1-Cas9-Blast monoclonal cells were plated to be at 30% confluency on the day of lentiviral  
535 gRNA/pair transduction. To transduce, 5% of the recipient cells' media was replaced with filtered virus,  
536 limiting the multiplicity of infection to  $< 0.3$ . Media was changed after 24 hours, and selection for  
537 transduced cells began 48 hours post-transduction. Puromycin was added at 2  $\mu\text{g}/\text{mL}$  for two days to  
538 assess the percentage of cells transduced, and then cells were maintained in 1  $\mu\text{g}/\text{mL}$  for 5 more days.

539  
540 After puromycin treatment, an initial population of cells was collected. Selection for loss of HPRT  
541 function was performed by applying 5  $\mu\text{M}$  6TG to the remaining cells at  $< 50\%$  confluency for 7 days.  
542 Enough cells were transduced and sampled at each timepoint to maintain minimum 2,000x average  
543 coverage of the library in each population.

544  
545 Sequencing of the baseline (*i.e.* pre-6TG) population revealed 98.4% of diversity of the lentiGuide-Puro-  
546 2xgRNA library was preserved from replicate 1, and replicate 2 retained 78.8%. As our deletions are  
547 highly overlapping, we proceeded with replicate 2 as all base-pairs are interrogated despite the lower  
548 diversity. We observed 95.6% retention of programmed library diversity in replicate 1 of single gRNA  
549 plasmid library and 71.2% of replicate 2.

550  
551 Interswapped gRNA pairs were observed in 35.5% of reads from the baseline pre-6TG sample. This is an  
552 increase from the 16% observed in reads from the lentiGuide-Puro-2xgRNA plasmid library. This  
553 suggests additional template switching during the library's amplification from gDNA, which requires  
554 more cycles of PCR. However, since we are directly sequencing each gRNA spacer as a read out opposed  
555 to using barcoded libraries (Zhu et al., 2016) and only taking exact sequence matches, this does not pose a  
556 problem.

#### 557 558 gRNA library amplification and sequencing from HAP1 cells

559

560 gDNA was extracted from the cells sampled before and after 6TG selection using the DNeasy Blood &  
561 Tissue kit (QIAGEN). KHF was used for all amplification steps. The libraries were initially amplified  
562 from a minimum of 6 ug of gDNA across thirty 50  $\mu$ L reactions, ensuring sampling of ~2 million haploid  
563 genome equivalents at each timepoint. Two additional PCRs were performed to add sequencing adapters  
564 and sample indices to the amplicon, with AMPure bead purification between each reaction. Amplification  
565 conditions were optimized using qPCR to minimize overamplification of the construct.

566  
567 Sequencing was performed on an Illumina Miseq using a 50-cycle kit. Read 1 and the Illumina Index read  
568 were used to sequence the two gRNAs in the paired gRNA construct prior to paired-end turnaround, and  
569 Read 2 was used to sequence the 9 bp sample index.

#### 570 571 Calculation of a selection score assignment per base-pair

572  
573 Custom Python scripts counted tallies of gRNAs (for individual gRNA library experiments) or gRNA  
574 pairs before and after selection. These counts were normalized to the total number of reads per sample.  
575 An enrichment ratio was calculated for each gRNA/pair by dividing its normalized read count after  
576 selection by its before selection read count. A selection score is the log<sub>10</sub> of the enrichment ratio  
577 (log<sub>10</sub>(after/before)). If a gRNA or gRNA pair was absent before selection, it was excluded from further  
578 analysis. Any gRNA pairs that used a self-paired gRNA with an independent selection ratio > 0 were also  
579 excluded from further analysis.

580  
581 If a gRNA/pair is absent after 6TG selection, its selection score as calculated will be a negative number  
582 relatively large in magnitude that is somewhat arbitrarily determined by the number of pre-selection  
583 reads. Thus, to limit the contribution of these scores to average measurements derived from many  
584 independent deletions, we set a minimum selection score equal to the middle of the bimodal distribution  
585 between the positively and negatively selected deletions of each replicate (**Supplementary Fig. 9**). For  
586 example, in ScanDel replicate 1, if the log<sub>10</sub>-value of a selection score was less than -0.35, that gRNA  
587 pair's score was set to -0.35. Each individual base-pair was assigned a per base-pair selection score by  
588 taking the mean of all deletions programmed to cover that base-pair. The per base-pair score was  
589 normalized to the median score for all positive scores in that replicate. The per base-pair selection score  
590 of each replicate was averaged to get the final selection score per base-pair. Per base-pair scores were  
591 uploaded as a bedgraph for visualization on the UCSC Genome Browser (<http://genome.ucsc.edu>).

592  
593 For the individual gRNA mutagenesis screen, we calculated selection scores per base-pair similarly,  
594 assuming a 10 bp deletion was made by each gRNA queried. If a base-pair was scored at the minimum  
595 negative threshold in one screen, it was given that value for the consensus selection score of the two  
596 replicates.

#### 597 598 Bulk ATAC-seq of HAP1 cells

599  
600 Two biological replicates were separately maintained (on 10cm dishes, split 1:10 three times per week)  
601 and processed separately. Chromatin accessibility in the HAP1 cell line was profiled with the ATAC-seq  
602 protocol (Buenrostro, Giresi, Zaba, Chang, & Greenleaf, 2013) with slight modifications. The media for  
603 10cm plates of confluent HAP1 cells was aspirated and replaced with 2 mL of ice cold lysis buffer  
604 ('CLB+'; made as described in the original paper, but supplemented with protease inhibitors (Sigma cat.  
605 no. P8340)). Cells were incubated on ice for 10 minutes in CLB+ and then were dislodged with a cell  
606 scraper and transferred to a 15 mL conical tube and pelleted at 500 rcf for 5 min at 4° C. Nuclei were re-  
607 suspended in 1 mL of CLB+ and counted on a hemocytometer. 50,000 nuclei in 22.5ul of CLB+ were  
608 combined with 2.5  $\mu$ L of TDE1 enzyme and 25ul of TD buffer (Illumina). Tagmentation conditions were  
609 as described in the original paper (37° C for 30 min). After MinElute purification into 10  $\mu$ L EB buffer  
610 (Qiagen), 5  $\mu$ L of tagmented DNA was amplified in 25  $\mu$ L reactions for 12 cycles using the NEBNext



611 Master Mix (NEB). Reactions were monitored with SYBR Green to ensure that samples were not  
612 overamplified. PCR products were cleaned once with a QiaQuick PCR Cleanup Kit (Qiagen) and once  
613 with 1x AMPure beads (Agencourt). The quality of the library was assessed on a 6% TBE gel and the  
614 yield was measured by Qubit (1.0) fluorometer (Invitrogen).

615  
616 Samples were sequenced on two paired-end Illumina NextSeq 500 runs. Read lengths were 2x75 bp for  
617 the first run and 2x151bp for the second run, so the second run was truncated to 75 bp. Sequencing reads  
618 were also trimmed for read-through of adapter sequences and quality with Trimmomatic ((Bolger, Lohse,  
619 & Usadel, 2014), 'NexteraPE-PE.fa:2:30:10:1:true TRAILING:3 SLIDINGWINDOW:4:10 MINLEN:20'  
620 parameters) and then mapped to the 1000 genomes integrated reference genome 'hs37d5'  
621 ([ftp://ftp.1000genomes.ebi.ac.uk/vol1/ftp/technical/reference/phase2\\_reference\\_assembly\\_sequence/](ftp://ftp.1000genomes.ebi.ac.uk/vol1/ftp/technical/reference/phase2_reference_assembly_sequence/))  
622 with bowtie2 (Langmead & Salzberg, 2012), using the '-X 2000 -3 1' parameters. Only properly paired  
623 and uniquely mapped reads with a mapping quality above 10 were retained ('samtools -f3 -F12 -q10').  
624 Reads mapping to the mitochondrial genome and non-chromosomal contigs were also filtered out. In  
625 addition, duplicate reads were removed with Picard (<http://broadinstitute.github.io/picard/>). After  
626 checking QC metrics on the individual replicates, reads from the two libraries were combined for  
627 downstream analysis. Hypersensitive sites were called (at a 1% false discovery rate) with the Hotspot  
628 algorithm (John et al., 2011).

629  
630 Validation and direct genotyping of positive signal from the screens

631  
632 gRNA pairs that drove the ScanDel signal surrounding *HPRT1*'s first exon were cloned into simple  
633 lentiGuide-Puro-2xgRNA libraries. The TSS ScanDel validation library contained four pairs and the  
634 intron 1 library contained five (**Supplementary Tables 1-2**). For the individual gRNA screen TSS  
635 library, ten gRNAs were cloned into lentiGuide-Puro (**Supplementary Table 3**). These constructs were  
636 lentivirally delivered to HAP1-Cas9-Blast cells, selected with 6TG, and gDNA extracted as described  
637 above.

638  
639 As the expected deletions could remove up to two kilobases, the loci were sequenced with a Pacific  
640 Biosciences RSII (University of Washington PacBio Sequencing Services, P6C4 chemistry, RSII  
641 platform). To prepare libraries for PacBio sequencing, the TSS- or intron 1-targeted regions were  
642 amplified from 800 ng of gDNA each, using four 50  $\mu$ L KHF reactions with primers adding sample  
643 indices and SbfI or NotI cut sites. The purified amplicons (Zymo Research DNA Clean & Concentrator-  
644 5) were digested with SbfI-HF (NEB) and NotI-HF (NEB), leaving sticky ends. 5'-phosphorylated  
645 SMRT-bell hairpin oligos (IDT) containing the PacBio priming site, hairpin-forming sequence, and  
646 resulting sticky ends for either SbfI or NotI were annealed by heating to 85° C and snap frozen in 10mM  
647 Tris 8.5, 0.1mM EDTA, 100 mM NaCl. These were ligated at 10x molar excess to the digested  
648 amplicons, destroying the restriction site once attached. To remove undigested amplicons and primers,  
649 this ligation was performed in the presence of further SbfI and NotI, and followed by treatment with  
650 Exo7 (Affymetrix) and Exo3 (Enzymatics).

651  
652 Only reads with over five circular consensus sequence passes and containing the expected first twelve 5'  
653 and 3' base-pairs of the amplicon were used for further analysis. Reads positive for complex inversions  
654 ( $\geq$  100 basepairs) were removed from the library using the Waterman-Eggert algorithm with match,  
655 mismatch, gap open, and gap extend scores of 2, 10, 10, and 5, respectively (Döring, Weese, Rausch, &  
656 Reinert, 2008). The resulting reads were then aligned to the amplicon reference using the  
657 NEEDLEALL (Rice, Longden, & Bleasby, 2000) aligner with a gap open penalty of 10 and a gap  
658 extension penalty of 0.5. Insertions were required to start within a window of five bases up or  
659 downstream of the putative cut site. Deletions were required to either start or end within the same 10 bp  
660 window or span the window. Reads that carried the same edit pattern were collapsed into haplotypes, and  
661 figures were generated using a custom D3 script.

662  
663  
664  
665  
666  
667  
668  
669  
670  
671  
672  
673  
674

Comparing deletion rate of U6-H1 versus U6-U6

Two protospacers were chosen to program a 365 bp deletion within the second intron of *HPRT1* and their spacers were cloned into a U6-H1 construct and U6-U6 construct (**Supplementary Fig. 1**). Virus was produced and delivered to cells, which were selected with puromycin, and gDNA extracted as described above. The locus was amplified in four successive rounds of nested PCR. The first reaction was only 3 cycles and included a forward primer with a 10-bp unique molecular index (UMI). The second reaction amplified any UMI-tagged fragments. The third and fourth reactions added sample indices and Illumina flow cell adapters. The products were AMPure cleaned between each reaction at a concentration that would lose primer dimer but retain the smaller deletion-holding fragments, and sequenced on a MiSeq. Any reads that contained the same UMI or edit pattern were collapsed using custom scripts and their alignments were visualized with the same D3 script as above.

675 **Acknowledgements**

676

677 For discussion and advice, the authors thank all the members of the Shendure Lab, particularly Lea  
678 Starita, Andrew Hill, Ron Hause, Seungsoo Kim, Martin Kircher, and Beth Martin. We thank the  
679 University of Washington PacBio Sequencing Services core for their assistance. This work was supported  
680 by an NIH Director's Pioneer Award (JS; DP1HG007811), National Human Genome Research Institute  
681 (NHGRI) (JS; 1R01HG006768), NHGRI and Division of Cancer Prevention, National Cancer Institute  
682 (JS; 1R01CA197139). MG is a National Science Foundation Graduate Research Fellow. DAC was  
683 supported in part by T32HL007828 from the National Heart, Lung, and Blood Institute. JS is an  
684 investigator of the Howard Hughes Medical Institute.

685

686 **Author contributions**

687

688 MG, GMF, and JS developed the initial concept. MG led experiments and analysis, together with GMF  
689 and with assistance from JHM and MDZ. AM performed guide on/off target scoring and development of  
690 Cas9 edit visualization pipeline. DAC performed and analyzed ATAC-seq in HAP1 cells. CL designed  
691 and implemented the custom sequencing protocol. MG, GMF, and JS designed experiments, interpreted  
692 data, and wrote the manuscript. JS provided overall supervision.

693

## Supplementary Figure 1

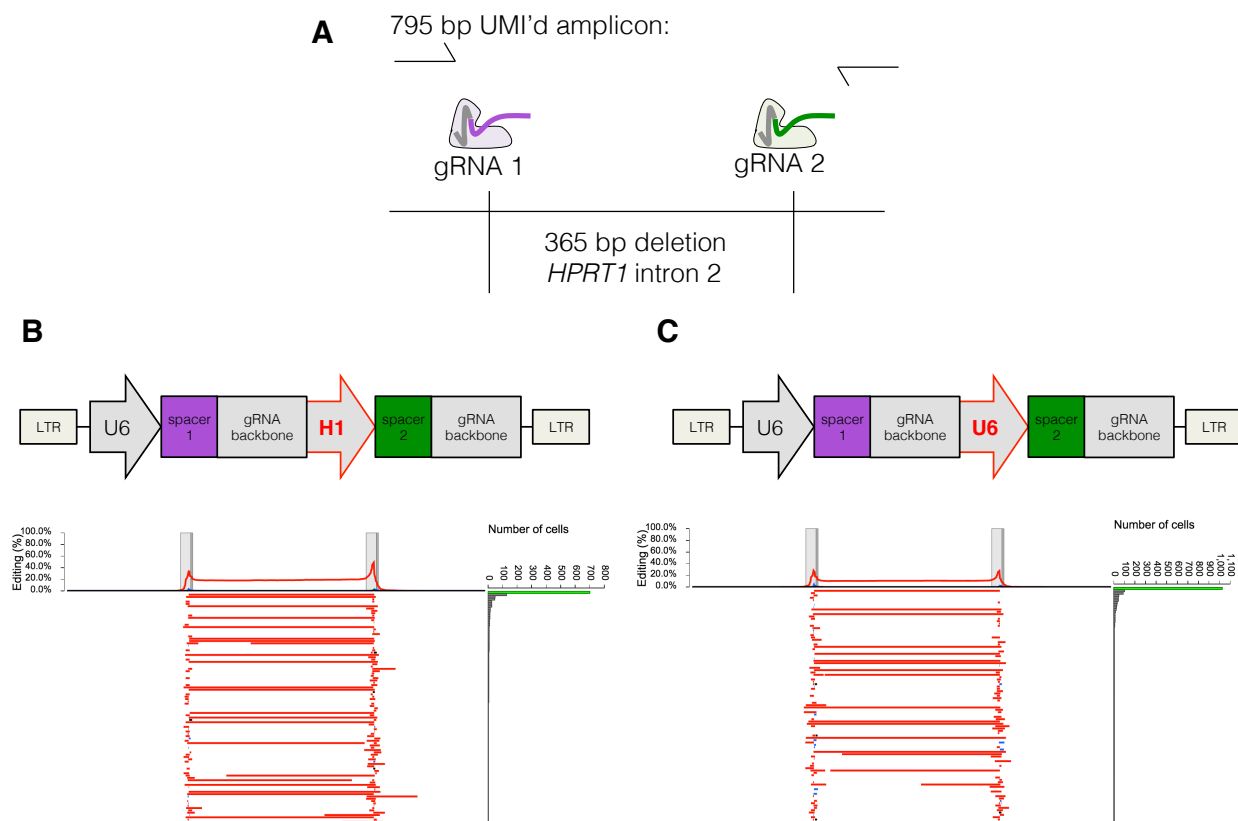

694  
695 **Supplementary Figure 1: The U6-H1 gRNA pair expression construct induces a higher deletion**  
696 **rate.**  
697

698 **A)** Two spacers were chosen to program a 365 bp deletion within the second intron of *HPRT1*. To test  
699 deletion efficiency of the method as described in **Fig. 1C**, virus was made from the constructs depicted in  
700 **B** and **C**, and separately transduced into HAP1 at MOI < 0.3. Following 1 week of puromycin selection,  
701 gDNA was extracted and the targeted region amplified. The first 3 cycles of this PCR contained a forward  
702 primer with a unique molecular tag (UMI) to track reads from the same original cell. Sequencing was  
703 performed on a MiSeq. Of note, PCR bias for smaller deletion-holding amplicons was reduced by  
704 collapsing reads with the same UMI, but the potential remains for higher clustering efficiency of the  
705 shorter amplicons.  
706

707 **B)** The spacers for the deletion in **A** were placed behind either a U6 or H1 PolIII promoter. 20% of  
708 sampled haplotypes contained the programmed deletion, but 36% of sampled haplotypes remained  
709 unedited, implying longer editing time could result in a higher deletion rate. Reads were generated as  
710 described in **A**, and aligned as described in **Methods** and **Fig. 3**. The per base-pair editing rate summed  
711 across all sampled haplotypes is charted as a percentage at top, and the top 100 most prevalent haplotypes  
712 are displayed below it. Red indicates deletions and blue insertions.  
713

714 **C)** The spacers for the deletion in **A** were each placed behind a U6 PolIII promoter, and delivered,  
715 sampled, and visualized as above. With this expression construct, 10% of sampled haplotypes contained  
716 the programmed deletion.

## Supplementary Figure 2

### A original pair

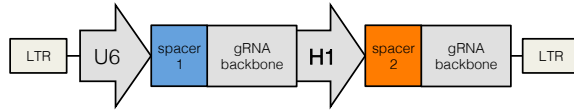

### B self-paired controls

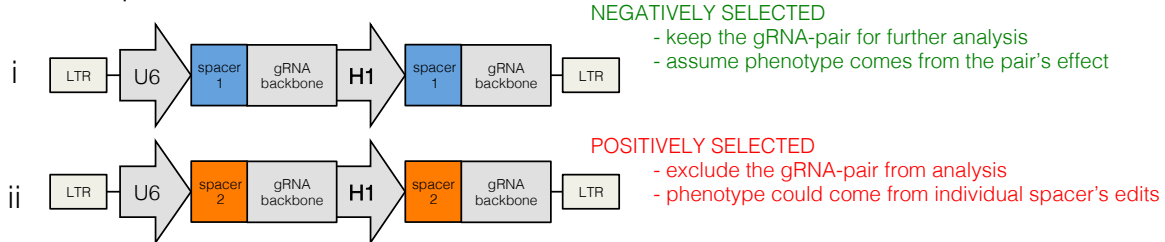

### C reverse order pair

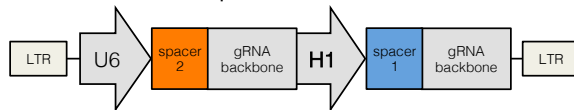

717  
718  
719  
720  
721  
722  
723  
724  
725  
726  
727  
728  
729  
730  
731  
732  
733  
734  
735  
736  
737  
738  
739

## Supplementary Figure 2: Self-paired spacers in the ScanDel library reveal phenotypes independently created by individual spacers.

A) The spacers used in every designed gRNA pair had their own self-paired control included in the programmed gRNA pair library.

B) The self-paired controls consisted of the exact same spacer included behind each promoter in the expression construct (two for each pair; (i) and (ii)). If a self-paired spacer was positively selected, any gRNA pairs that included that spacer were excluded from further analysis. This avoided any confounding effects of alternative repair outcomes that result from an individual gRNA's edit that could cause 6TG resistance (e.g. a ~10 bp indel disrupting a transcription factor binding site, or disrupting an off-target locus that affects 6TG resistance, or an individual gRNA inducing translocations of *HPRT1* at a high rate). By excluding these gRNAs, we can more confidently attribute observed phenotypes to programmed deletion induced by the gRNA pairs.

C) Each gRNA pair was included in both possible orderings on the microarray. This was intended to minimize the impact of differences between the promoters, as well as to increase the chance that each deletion will be represented in the library, as synthesizing each pair twice reduces loss due to synthesis errors and cloning bottlenecks.

### Supplementary Figure 3

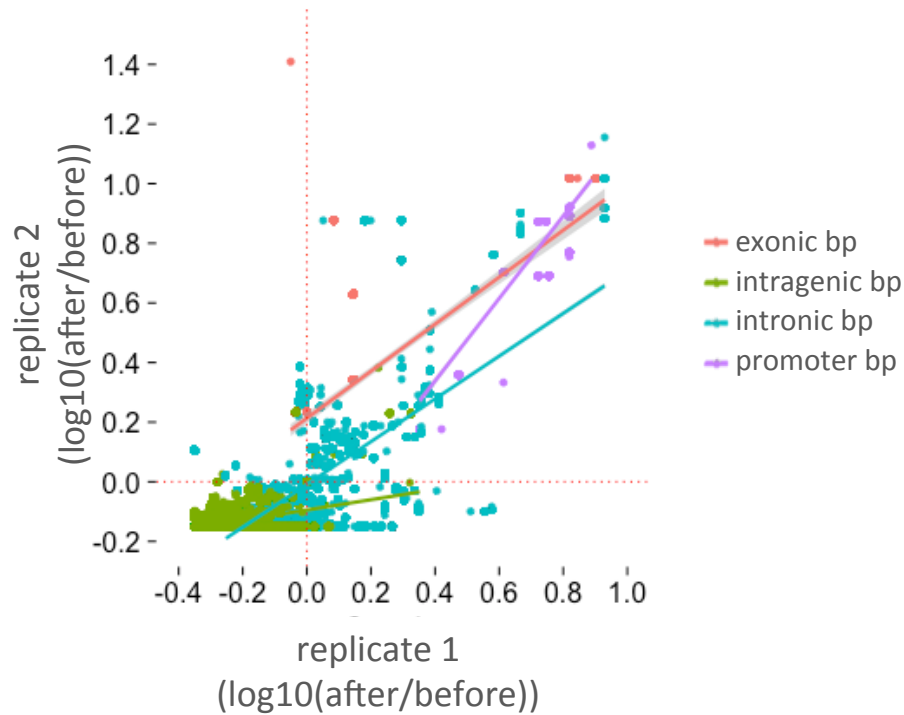

740  
741  
742  
743  
744  
745  
746  
747  
748  
749  
750

#### Supplementary Figure 3: ScanDel scores correlate across two biological replicates.

The ScanDel selection scores for each biological replicate were calculated per base-pair by averaging the  $\log_{10}(\text{after/before } 6\text{TG})$  for every programmed deletion that covers that base-pair. Least squares lines and points are colored by sequence content category. The stronger correlation for the 'intronic' category is driven by sequences proximal to the exons as seen in **Fig. 3**. Red corresponds to exons (Pearson: 0.736); green to intragenic regions (Pearson: 0.417); blue to intronic regions (within 2 Kb of an exon, Pearson: 0.628; deeply intronic, Pearson: -0.0194); and purple is the promoter (1 Kb upstream of the TSS, Pearson: 0.905).

## Supplementary Figure 4

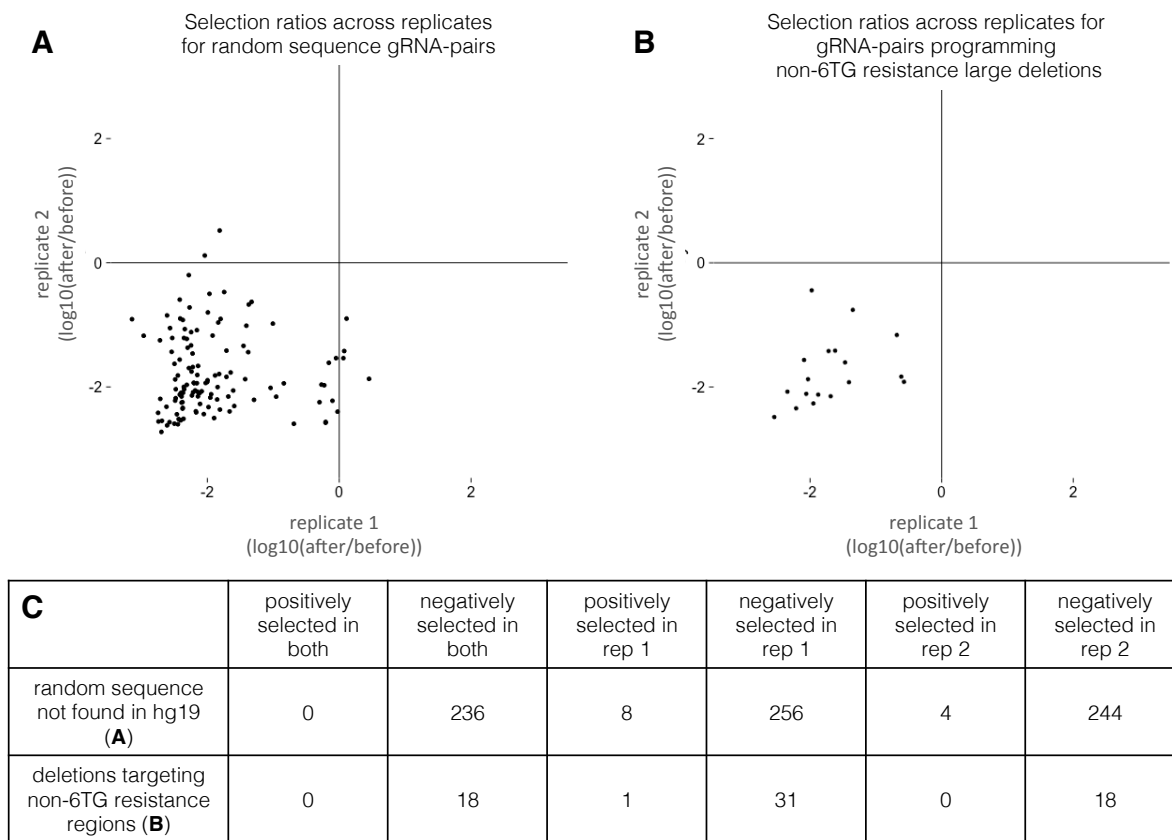

751  
752 **Supplementary Figure 4: None of the negative control gRNA pairs were positively selected by 6TG**  
753 **in both ScanDel replicates.**

754  
755 **A)** Negative control gRNA pairs targeting random sequences not found in hg19 were given a selection  
756 score of  $\log_{10}(\text{after}/\text{before } 6\text{TG})$ . Only gRNA pairs sampled in both replicates are plotted.

757  
758 **B)** Additional negative control gRNA pairs were programmed to create 1 and 2 Kb deletions in regions  
759 not expected to cause 6TG resistance. Selection scores were calculated for each gRNA pair as in **A**, and  
760 plotted for gRNA pairs found in both replicates. These region's coordinates were randomly generated  
761 from poorly conserved sequence (Pollard, Hubisz, Rosenbloom, & Siepel, 2010) not within 10 Kb of any  
762 gene and far from *HPRT1* (chr8:23768553-23771053, chr4:25697737-25700237, chr9:41022164-  
763 41024664, chr5:12539119-12541619, chr6:23837183-23839683, chr8:11072736-11075236).

764  
765 **C)** Table showing counts of positively and negatively selected negative control gRNA pairs across  
766 experiments.

767

## Supplementary Figure 5

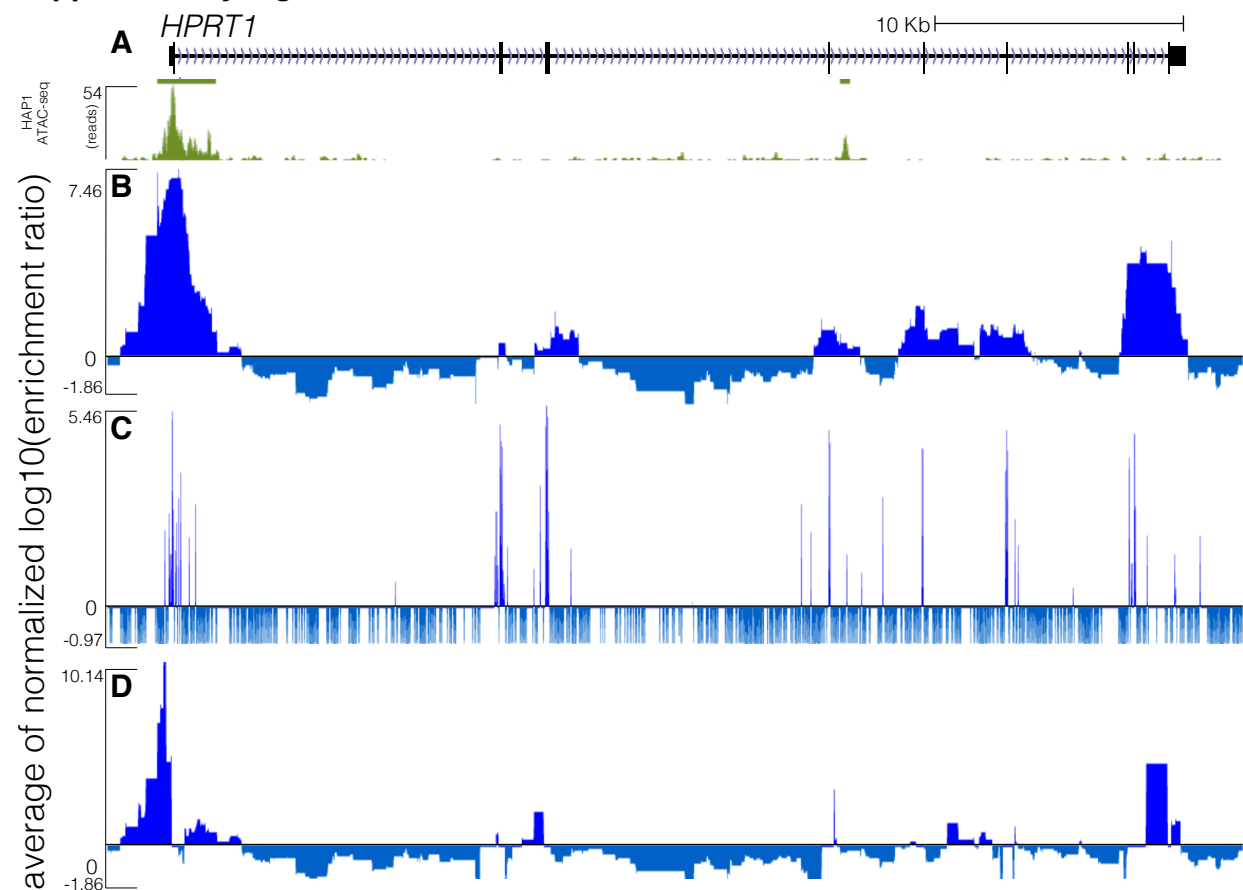

768  
769  
770  
771  
772  
773  
774  
775  
776  
777  
778  
779  
780  
781  
782  
783  
784  
785  
786  
787  
788  
789  
790

**Supplementary Figure 5: All exons and some exon-proximal non-coding regions score strongly in both the ScanDel gRNA pair screen and the individual gRNA screen.**

**A)** ATAC-seq data (green) from the HAP1 cell line displayed for the *HPRT1* locus (chrX:133,591,675-133,637,198, hg19). Bars depict hotspots (John et al., 2011) and beneath is the pile-up representation of ATAC-seq reads.

**B)** The same ScanDel data is displayed as in **Fig. 2C** but zoomed-in on the *HPRT1* locus. Each base-pair's score is the mean of the  $\log_{10}(\text{after}/\text{before } 6\text{TG})$  values for all the programmed deletions that cover that base-pair. These scores are normalized to the median positive score from the replicate. The average of the two replicates' scores for each base-pair is displayed.

**C)** The same individual gRNA data is displayed as in **Fig. 2D** but zoomed in on *HPRT1*. Each base-pair score is the mean of the  $\log_{10}(\text{after}/\text{before } 6\text{TG})$  values for all the inferred  $\sim 10$  bp deletions that remove that base-pair. The normalized average of the two replicates' scores for that base-pair is displayed.

**D)** The same ScanDel track as in **A** but with per base-pair scores calculated after excluding any deletions programmed to disrupt an exon.



**Supplementary Figure 6**

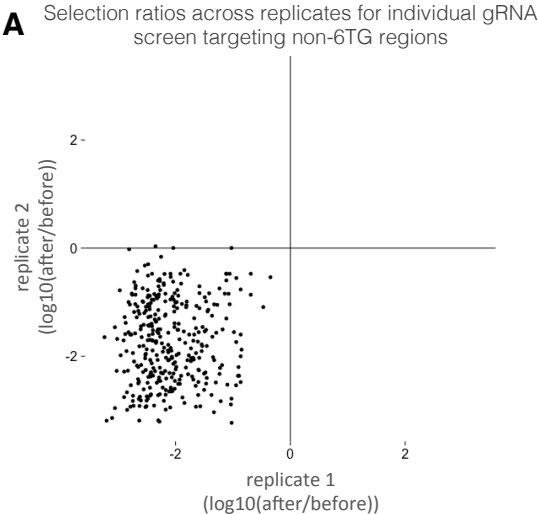

| <b>B</b>                                               | positively selected in both | negatively selected in both | positively selected in rep 1 | negatively selected in rep 1 | positively selected in rep 2 | negatively selected in rep 2 |
|--------------------------------------------------------|-----------------------------|-----------------------------|------------------------------|------------------------------|------------------------------|------------------------------|
| gRNA targeting non-6TG resistance regions ( <b>A</b> ) | 0                           | 336                         | 2                            | 520                          | 3                            | 344                          |
| random sequence not found in hg19                      | 0                           | 9                           | 0                            | 12                           | 0                            | 9                            |

791  
 792 **Supplementary Figure 6: None of the negative control random-sequence gRNAs were positively**  
 793 **selected in both individual gRNA screen replicates.**

794  
 795 **A)** Selection scores across replicates for individual gRNAs that target regions not expected to induce 6TG  
 796 resistance (as in **Supplementary Figure 4**). Only gRNAs sampled in both replicates are plotted.

797  
 798 **B)** Table of the negative control gRNAs selected in both, either, or neither biological replicate.

799  
 800  
 801  
 802

### Supplementary Figure 7

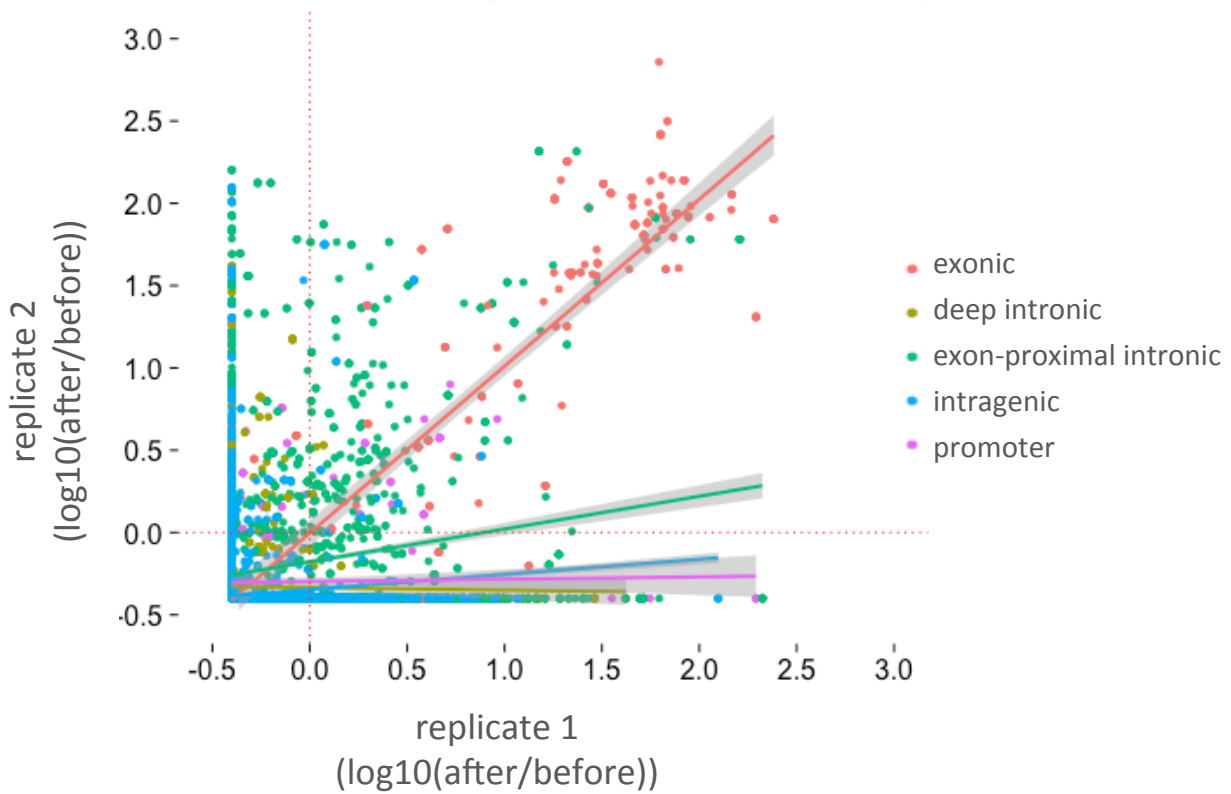

803  
804 **Supplementary Figure 7: Correlation of the individual gRNA screen scores across two biological**  
805 **replicates.**

806  
807 The individual gRNA scores for each biological replicate were calculated per base-pair and presented as  
808 mean of  $\log_{10}(\text{after}/\text{before } 6\text{TG})$  between replicates. Least squares lines and points are colored by  
809 sequence content category. Specifically, intronic sequence within 2 Kb of an exon is colored in green  
810 (Pearson: 0.176); exons are red (Pearson: 0.818); deep intronic is yellow (Pearson: -0.14); intragenic  
811 sequences are blue (Pearson: 0.070; and promoter sequence (2 Kb upstream of the TSS) is purple  
812 (Pearson: 0.022).

813  
814

Supplementary Figure 8

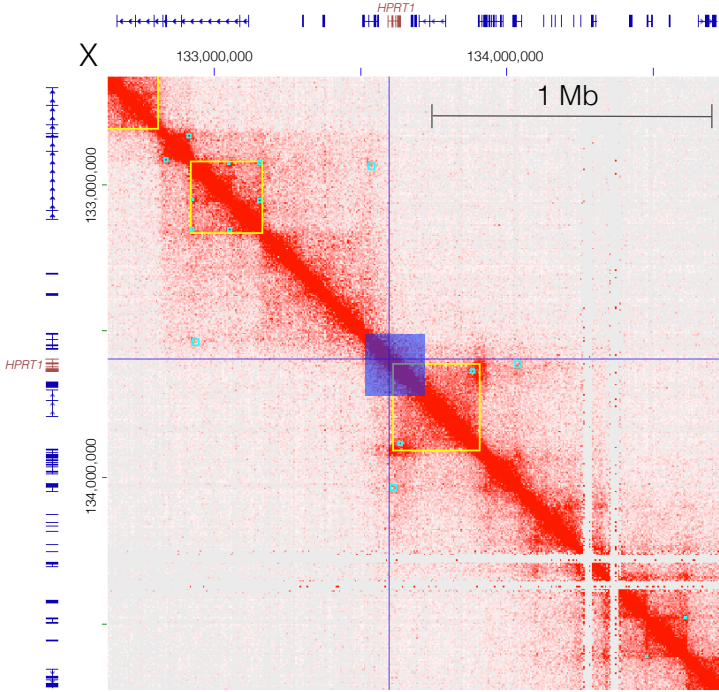

815  
 816 **Supplementary Figure 8: Region interrogated with ScanDel only partially surveys a 300 Kb**  
 817 **topologically associated domain (TAD) found in HAP1 cells.**  
 818

819 A heatmap of interactions between 5 Kb bins along chrX:132,669,000-134,716,000 (hg19) in HAP1 cells  
 820 (Sanborn et al., 2015) (Juicebox 1.4 (Durand et al., 2016), balanced normalization). RefSeq gene  
 821 annotations are drawn across the axes, with the *HPRT1* gene model drawn in red. Blue lines mark its TSS  
 822 and the 206 Kb surveyed by ScanDel is highlighted as a dark blue box. Light blue boxes mark peaks and  
 823 yellow boxes mark TADs as called by Sanborn et al.  
 824  
 825

## Supplementary Figure 9

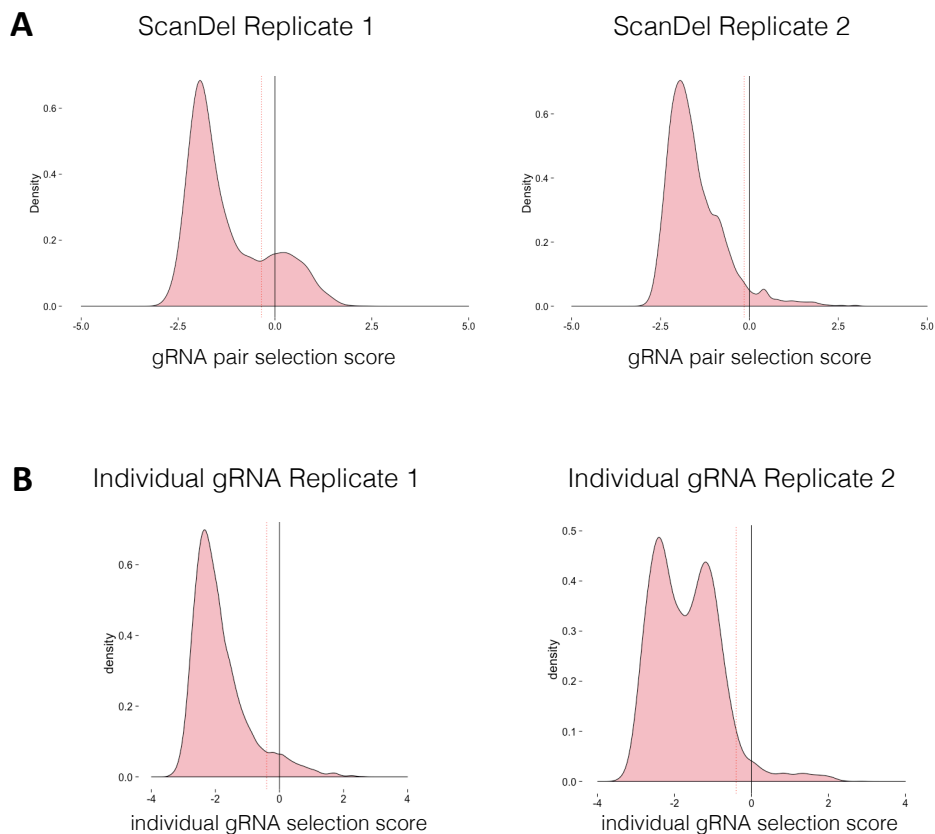

826  
827 **Supplementary Figure 9: Distribution of selection scores across biological replicates for ScanDel**  
828 **gRNA pairs or individual gRNAs.**

829  
830 **A)** Each gRNA pair in the ScanDel screens was assigned a selection score ( $\log_{10}(\text{after}/\text{before } 6\text{TG})$ ). The  
831 minimum selection score threshold described in **Methods** (-0.35 for replicate 1, -0.15 for replicate 2) is  
832 drawn with a dotted red line.

833  
834 **B)** Each gRNA in the individual gRNA screen was assigned a selection score as in **A**, for each replicate.  
835 The minimum negative selection score threshold (-0.4 for both replicates) is drawn with a dotted red line  
836 (explanation in **Methods**).  
837

838 **Supplementary Tables**

| gRNA pair spacer 1   | gRNA pair spacer 2   | distance of closest protospacer to TSS (bp) | replicate 1 before 6TG raw read count (number of reads) | replicate 1 after 6TG raw read count (number of reads) | replicate 1 before 6TG normalized read count (number of reads / total reads from sample) | replicate 1 after 6TG normalized read count (number of reads / total reads from sample) | replicate 1 selection score (log 10 after / before) | replicate 2 before 6TG normalized read count (number of reads) | replicate 2 after 6TG normalized read count (number of reads) | replicate 2 before 6TG normalized read count (number of reads / total reads from sample) | replicate 2 after 6TG normalized read count (number of reads / total reads from sample) | selection score (log 10 enrichment ratio) (log 10 after / before) |
|----------------------|----------------------|---------------------------------------------|---------------------------------------------------------|--------------------------------------------------------|------------------------------------------------------------------------------------------|-----------------------------------------------------------------------------------------|-----------------------------------------------------|----------------------------------------------------------------|---------------------------------------------------------------|------------------------------------------------------------------------------------------|-----------------------------------------------------------------------------------------|-------------------------------------------------------------------|
| CCAAGACCTTGCACTACTCT | TGGTGGATGCTGGAGCTATA | 316                                         | 519                                                     | 679                                                    | 0.000208221                                                                              | 0.000510065                                                                             | 0.3891006                                           | 769                                                            | 1                                                             | 0.000273374                                                                              | 9.30685E-07                                                                             | -2.4679549                                                        |
| GGCAGTACAGTCAGCAAAAT | AATCAGGGAGCCCTCTGAAT | 194                                         | 108                                                     | 1                                                      | 4.33292E-05                                                                              | 7.512E-07                                                                               | -1.7610255                                          | 26                                                             | 1                                                             | 9.24282E-06                                                                              | 9.30685E-07                                                                             | -0.9970019                                                        |
| TATTATGGAACAGTAACT   | CAGGCTCACTAGTAGCCGT  | 105                                         | 53                                                      | 511                                                    | 2.12634E-05                                                                              | 0.000383863                                                                             | 1.2565433                                           | not sampled                                                    |                                                               |                                                                                          |                                                                                         |                                                                   |
| GCGGGGCTGACTGCTCAGG  | CTTATCTGGAGAGGCAGC   | -123                                        | 856                                                     | 5716                                                   | 0.000343424                                                                              | 0.004293857                                                                             | 1.0970167                                           | 1139                                                           | 4260                                                          | 0.000404907                                                                              | 0.003964716                                                                             | 0.9908573                                                         |

839  
840 **Supplementary Table 1.** Read count data and selection scores for the 4 gRNA pairs upstream of exon 1  
841 used for **Fig. 3A-D**. Green is positively selected and red is negatively selected.

| gRNA pair spacer 1  | gRNA pair spacer 2  | distance of closest protospacer to 3' boundary of exon 1 (bp) | replicate 1 before 6TG raw read count (number of reads) | replicate 1 after 6TG raw read count (number of reads) | replicate 1 before 6TG normalized read count (number of reads / total reads from sample) | replicate 1 after 6TG normalized read count (number of reads / total reads from sample) | replicate 1 selection score (log 10 after / before) | replicate 2 before 6TG normalized read count (number of reads) | replicate 2 after 6TG normalized read count (number of reads) | replicate 2 before 6TG normalized read count (number of reads / total reads from sample) | replicate 2 after 6TG normalized read count (number of reads / total reads from sample) | replicate 2 selection score (log 10 after / before) |
|---------------------|---------------------|---------------------------------------------------------------|---------------------------------------------------------|--------------------------------------------------------|------------------------------------------------------------------------------------------|-----------------------------------------------------------------------------------------|-----------------------------------------------------|----------------------------------------------------------------|---------------------------------------------------------------|------------------------------------------------------------------------------------------|-----------------------------------------------------------------------------------------|-----------------------------------------------------|
| AAACTGGCCGCCCCCGCTG | GCCTCTACTAGGCCAGGCA | 117                                                           | 254                                                     | 2331                                                   | 0.000101904                                                                              | 0.001751046                                                                             | 1.2351068                                           | 1                                                              | 1                                                             | 3.55493E-07                                                                              | 9.30685E-07                                                                             | 0.4179714                                           |
| ATCCGACGTGGGGCTGGG  | CTAAGATATTTACTGGC   | 75                                                            | 157                                                     | 946                                                    | 6.29679E-05                                                                              | 0.000710633                                                                             | 1.0523897                                           | 499                                                            | 86                                                            | 0.000177391                                                                              | 3.35086E-05                                                                             | -0.7238266                                          |
| CACGAGTCTCTTTTCCA   | GCCTCTACTAGGCCAGGCA | 221                                                           | 100                                                     | 342                                                    | 4.01197E-05                                                                              | 0.00025691                                                                              | 0.8064243                                           | 145                                                            | 1                                                             | 5.15465E-05                                                                              | 9.30685E-07                                                                             | -3.7433966                                          |
| GCGTCTACTAGGCCAGGCA | GTTACAGCCACCGCCGAGG | 30                                                            | 184                                                     | 586                                                    | 7.38202E-05                                                                              | 0.000440203                                                                             | 0.775478                                            | 35                                                             | 14134                                                         | 1.24423E-05                                                                              | 0.013154204                                                                             | 3.0241685                                           |
| GGCAGCGAAAGCCACCACT | AGCAACCTTCGATGGCCCC | 431                                                           | 1034                                                    | 5822                                                   | 0.000414837                                                                              | 0.004373485                                                                             | 1.0229499                                           | 2718                                                           | 18435                                                         | 0.00096623                                                                               | 0.017157168                                                                             | 1.2493651                                           |

842  
843 **Supplementary Table 2.** Read count data and selection scores for the 5 gRNA pairs in intron 1 used for  
844 **Fig. 3E-H**.

| gRNA                 | distance from TSS (bp) | replicate 1 before 6TG raw read count (number of reads) | replicate 1 after 6TG raw read count (number of reads) | replicate 1 before 6TG normalized read count (number of reads / total reads from sample) | replicate 1 after 6TG normalized read count (number of reads / total reads from sample) | replicate 1 selection score (log 10 after / before) | replicate 2 before 6TG normalized read count (number of reads) | replicate 2 after 6TG normalized read count (number of reads) | replicate 2 before 6TG normalized read count (number of reads / total reads from sample) | replicate 2 after 6TG normalized read count (number of reads / total reads from sample) | replicate 2 selection score (log 10 after / before) |
|----------------------|------------------------|---------------------------------------------------------|--------------------------------------------------------|------------------------------------------------------------------------------------------|-----------------------------------------------------------------------------------------|-----------------------------------------------------|----------------------------------------------------------------|---------------------------------------------------------------|------------------------------------------------------------------------------------------|-----------------------------------------------------------------------------------------|-----------------------------------------------------|
| TATTATGGAACAGTAACT   | 1910                   | 7                                                       | 1                                                      | 7.35E-07                                                                                 | 1.29E-07                                                                                | -0.757                                              | not sampled                                                    |                                                               |                                                                                          |                                                                                         |                                                     |
| CTTATCTGGAGAGGCAGC   | 1663                   | 540                                                     | 270                                                    | 5.67E-05                                                                                 | 3.47E-05                                                                                | -0.213                                              | 1437                                                           | 2                                                             | 0.000172975                                                                              | 2.42125E-07                                                                             | -2.854                                              |
| TGGTGGATGCTGGAGCTATA | 1111                   | 82                                                      | 26                                                     | 8.61E-06                                                                                 | 3.35E-06                                                                                | -0.411                                              | 1523                                                           | 542                                                           | 0.000183327                                                                              | 6.56159E-05                                                                             | -0.446                                              |
| CTGCTAATTAATCTCAGAT  | 1033                   | 385                                                     | 1                                                      | 4.04E-05                                                                                 | 1.29E-07                                                                                | -2.497                                              | not sampled                                                    |                                                               |                                                                                          |                                                                                         |                                                     |
| GGCAGTACAGTCAGCAAAAT | 931                    | 856                                                     | 1                                                      | 8.99E-05                                                                                 | 1.29E-07                                                                                | -2.844                                              | 662                                                            | 28                                                            | 7.96864E-05                                                                              | 3.38975E-06                                                                             | -1.371                                              |
| CCAAGACTTGCACTACTCTG | 308                    | 858                                                     | 4110                                                   | 9.01E-05                                                                                 | 5.29E-04                                                                                | 0.769                                               | 195                                                            | 1                                                             | 2.34726E-05                                                                              | 1.21063E-07                                                                             | -2.388                                              |
| CCAGTACTCGGTAATCT    | 269                    | 1731                                                    | 13867                                                  | 1.82E-04                                                                                 | 1.79E-03                                                                                | 0.992                                               | 967                                                            | 82                                                            | 0.0001164                                                                                | 9.92714E-06                                                                             | -1.069                                              |
| AACTAGGAGCCCTCTGAAT  | 186                    | 216                                                     | 1                                                      | 2.27E-05                                                                                 | 1.29E-07                                                                                | -2.246                                              | 258                                                            | 1                                                             | 3.1056E-05                                                                               | 1.21063E-07                                                                             | -2.409                                              |
| CAGGCTCACTAGTAGCCGT  | 97                     | 1282                                                    | 11735                                                  | 1.35E-04                                                                                 | 1.51E-03                                                                                | 1.050                                               | 288                                                            | 42                                                            | 3.46672E-05                                                                              | 5.08463E-06                                                                             | -0.834                                              |
| GCGGGGCTGACTGCTCAGG  | -131                   | 1029                                                    | 4297                                                   | 1.08E-04                                                                                 | 5.53E-04                                                                                | 0.709                                               | 895                                                            | 50                                                            | 0.000107733                                                                              | 6.05313E-06                                                                             | -1.250                                              |

845  
846 **Supplementary Table 3.** Read count data and selection scores (for both replicates of the individual  
847 gRNA screen) for the 10 individual gRNAs targeting regions upstream of exon 1 and displayed in **Fig. 4**.  
848  
849  
850  
851  
852  
853

- 854 **References**
- 855 Aguet, F., Brown, A. A., Castel, S., Davis, J. R., Mohammadi, P., Segre, A. V., ... Montgomery, S. B.
- 856 (2016). Local genetic effects on gene expression across 44 human tissues. *bioRxiv*.
- 857 Aparicio-Prat, E., Arnan, C., Sala, I., Bosch, N., Guigó, R., & Johnson, R. (2015). DECKO: Single-oligo,
- 858 dual-CRISPR deletion of genomic elements including long non-coding RNAs. *BMC Genomics*,
- 859 *16*(1), 846. <http://doi.org/10.1186/s12864-015-2086-z>
- 860 Ardlie, K. G., Deluca, D. S., Segre, A. V., Sullivan, T. J., Young, T. R., Gelfand, E. T., ... Lockhart, N.
- 861 C. (2015). The Genotype-Tissue Expression (GTEx) pilot analysis: Multitissue gene regulation in
- 862 humans. *Science*, *348*(6235), 648–660. <http://doi.org/10.1126/science.1262110>
- 863 Banerji, J., Rusconi, S., & Schaffner, W. (1981). Expression of a beta-globin gene is enhanced by remote
- 864 SV40 DNA sequences. *Cell*, *27*(2 PART 1), 299–308. [http://doi.org/10.1016/0092-8674\(81\)90413-](http://doi.org/10.1016/0092-8674(81)90413-X)
- 865 X
- 866 Bolger, A. M., Lohse, M., & Usadel, B. (2014). A flexible trimmer for Illumina sequence data.
- 867 *Bioinformatics*, *30*, 2114.
- 868 Boyle, A. P., Hong, E. L., Hariharan, M., Cheng, Y., Schaub, M. A., Kasowski, M., ... Snyder, M.
- 869 (2012). Annotation of functional variation in personal genomes using RegulomeDB. *Genome*
- 870 *Research*, *22*(9), 1790–1797. <http://doi.org/10.1101/gr.137323.112>
- 871 Buenrostro, J. D., Giresi, P. G., Zaba, L. C., Chang, H. Y., & Greenleaf, W. J. (2013). Transposition of
- 872 native chromatin for fast and sensitive epigenomic profiling of open chromatin, DNA-binding
- 873 proteins and nucleosome position. *Nat Meth*, *10*(12), 1213–1218. JOUR. Retrieved from
- 874 <http://dx.doi.org/10.1038/nmeth.2688>
- 875 Byrne, S. M., Ortiz, L., Mali, P., Aach, J., & Church, G. M. (2015). Multi-kilobase homozygous targeted
- 876 gene replacement in human induced pluripotent stem cells. *Nucleic Acids Research*, *43*(3), e21.
- 877 <http://doi.org/10.1093/nar/gku1246>
- 878 Canver, M. C., Bauer, D. E., Dass, A., Yien, Y. Y., Chung, J., Masuda, T., ... Orkin, S. H. (2014).
- 879 Characterization of genomic deletion efficiency mediated by clustered regularly interspaced
- 880 palindromic repeats (CRISPR)/cas9 nuclease system in mammalian cells. *Journal of Biological*
- 881 *Chemistry*, *289*(31), 21312–21324. <http://doi.org/10.1074/jbc.M114.564625>
- 882 Canver, M. C., Smith, E. C., Sher, F., Pinello, L., Sanjana, N. E., Shalem, O., ... Bauer, D. E. (2015).
- 883 BCL11A enhancer dissection by Cas9-mediated in situ saturating mutagenesis. *Nature*.
- 884 <http://doi.org/10.1038/nature15521>
- 885 Chen, S., Sanjana, N. E., Zheng, K., Shalem, O., Lee, K., Shi, X., ... Sharp, P. A. (2015). Genome-wide
- 886 CRISPR screen in a mouse model of tumor growth and metastasis. *Cell*, *160*(6), 1246–1260.
- 887 <http://doi.org/10.1016/j.cell.2015.02.038>
- 888 Chong, J. X., Buckingham, K. J., Jhangiani, S. N., Boehm, C., Sobreira, N., Smith, J. D., ... Bamshad, M.
- 889 J. (2015). The Genetic Basis of Mendelian Phenotypes: Discoveries, Challenges, and Opportunities.
- 890 *American Journal of Human Genetics*, *97*(2), 199–215. <http://doi.org/10.1016/j.ajhg.2015.06.009>
- 891 Coetzee, S. G., Rhie, S. K., Berman, B. P., Coetzee, G. A., & Noushmehr, H. (2012). FunciSNP: An
- 892 R/bioconductor tool integrating functional non-coding data sets with genetic association studies to
- 893 identify candidate regulatory SNPs. *Nucleic Acids Research*, *40*(18).
- 894 <http://doi.org/10.1093/nar/gks542>
- 895 Diao, Y., Li, B., Meng, Z., Jung, I., Lee, A., Dixon, J., ... Ren, B. (2016). A new class of temporarily
- 896 phenotypic enhancers identified by CRISPR/Cas9 mediated genetic screening. *Genome Research*,
- 897 1–9. <http://doi.org/10.1101/gr.197152.115>
- 898 Doench, J. G., Fusi, N., Sullender, M., Hegde, M., Vaimberg, E. W., Donovan, K. F., ... Root, D. E.
- 899 (2016). Optimized sgRNA design to maximize activity and minimize off-target effects of CRISPR-
- 900 Cas9. *Nature Biotechnology*, *34*(November 2015), 1–12. <http://doi.org/10.1038/nbt.3437>
- 901 Döring, A., Weese, D., Rausch, T., & Reinert, K. (2008). SeqAn an efficient, generic C++ library for
- 902 sequence analysis. *BMC Bioinformatics*, *9*, 11. <http://doi.org/10.1186/1471-2105-9-11>
- 903 Durand, N. C., Robinson, J. T., Shamim, M. S., Machol, I., Mesirov, J. P., Lander, E. S., & Aiden, E. L.
- 904 (2016). Juicebox Provides a Visualization System for Hi-C Contact Maps with Unlimited Zoom.

905 *Cell Systems*, 3(1), 99–101. <http://doi.org/10.1016/j.cels.2015.07.012>

906 ENCODE Project Consortium, Bernstein, B. E., Birney, E., Dunham, I., Green, E. D., Gunter, C., &  
907 Snyder, M. (2012). An integrated encyclopedia of DNA elements in the human genome. *Nature*,  
908 489(7414), 57–74. <http://doi.org/nature11247> [pii]n10.1038/nature11247

909 Ernst, J., & Kellis, M. (2012). ChromHMM: automating chromatin-state discovery and characterization.  
910 *Nature Methods*, 9(3), 215–6. <http://doi.org/10.1038/nmeth.1906>

911 Fu, R., Ceballos-Picot, L., Rosa, J., Larovere, L. E., Yamada, Y., Nguyen, K. V., ... Jinnah, H. A. (2014).  
912 Genotype-phenotype correlations in neurogenetics: Lesch-Nyhan disease as a model disorder. *Brain*,  
913 137(5), 1282–1303. <http://doi.org/10.1093/brain/awt202>

914 Hoffman, M. M., Buske, O. J., Wang, J., Weng, Z., Bilmes, J. a, & Noble, W. S. (2012). Unsupervised  
915 pattern discovery in human chromatin structure through genomic segmentation. *Nature Methods*,  
916 9(5), 473–6. <http://doi.org/10.1038/nmeth.1937>

917 Hsu, P. D., Scott, D. a, Weinstein, J. a, Ran, F. A., Konermann, S., Agarwala, V., ... Zhang, F. (2013).  
918 DNA targeting specificity of RNA-guided Cas9 nucleases. *Nature Biotechnology*, 31(9), 827–32.  
919 <http://doi.org/10.1038/nbt.2647>

920 John, S., Sabo, P. J., Thurman, R. E., Sung, M.-H., Biddie, S. C., Johnson, T. A., ... Stamatoyannopoulos,  
921 J. A. (2011). Chromatin accessibility pre-determines glucocorticoid receptor binding patterns.  
922 *Nature Genetics*, 43(3), 264–268. <http://doi.org/10.1038/ng.759>

923 Kircher, M., Witten, D. M., Jain, P., O’Roak, B. J., Cooper, G. M., & Shendure, J. (2014). A general  
924 framework for estimating the relative pathogenicity of human genetic variants. *Nature Genetics*,  
925 46(3), 310–315. <http://doi.org/10.1038/ng.2892>

926 Korkmaz, G., Lopes, R., Ugalde, A. P., Nevedomskaya, E., Han, R., Myacheva, K., ... Agami, R. (2016).  
927 Functional genetic screens for enhancer elements in the human genome using CRISPR-Cas9. *Nature*  
928 *Biotechnology*, (August 2015), 1–10. <http://doi.org/10.1038/nbt.3450>

929 Langmead, B., & Salzberg, S. L. (2012). Fast gapped-read alignment with Bowtie 2. *Nat Methods*, 9(4),  
930 357–359. <http://doi.org/10.1038/nmeth.1923>

931 Lesch, M., & Nyhan, W. L. W. (1964). A familial disorder of uric acid metabolism and central nervous  
932 system function. *The American Journal of Medicine*, 9(April), 561–570.  
933 [http://doi.org/10.1016/0002-9343\(64\)90104-4](http://doi.org/10.1016/0002-9343(64)90104-4)

934 Li, M. J., Wang, L. Y., Xia, Z., Sham, P. C., & Wang, J. (2013). GWAS3D: Detecting human regulatory  
935 variants by integrative analysis of genome-wide associations, chromosome interactions and histone  
936 modifications. *Nucleic Acids Research*, 41(Web Server issue), 150–158.  
937 <http://doi.org/10.1093/nar/gkt456>

938 Maurano, M. T., Humbert, R., Rynes, E., Thurman, R. E., Haugen, E., Wang, H., ...  
939 Stamatoyannopoulos, J. A. (2012). Systematic Localization of Common Disease-Associated  
940 Variation in Regulatory DNA. *Science*, 337(6099), 1190–1195.  
941 <http://doi.org/10.1126/science.1222794>

942 McKenna, A., Findlay, G. M., Gagnon, J. A., Horwitz, M. S., Schier, A. F., & Shendure, J. (2016).  
943 Whole-organism lineage tracing by combinatorial and cumulative genome editing. *Science*,  
944 353(6298), aaf7907-aaf7907. <http://doi.org/10.1126/science.aaf7907>

945 Patwardhan, R. P., Lee, C., Litvin, O., Young, D. L., Pe’er, D., & Shendure, J. (2009). High-resolution  
946 analysis of DNA regulatory elements by synthetic saturation mutagenesis. *Nature Biotechnology*,  
947 27(12), 1173–1175. <http://doi.org/10.1038/nbt.1589>

948 Pollard, K. S., Hubisz, M. J., Rosenbloom, K. R., & Siepel, A. (2010). Detection of nonneutral  
949 substitution rates on mammalian phylogenies. *Genome Research*, 20(1), 110–121.  
950 <http://doi.org/10.1101/gr.097857.109>

951 Rajagopal, N., Srinivasan, S., Kooshesh, K., Guo, Y., Edwards, M. D., Banerjee, B., ... Sherwood, R. I.  
952 (2016). High-throughput mapping of regulatory DNA. *Nature Biotechnology*, (January).  
953 <http://doi.org/10.1038/nbt.3468>

954 Reid, L. H., Gregg, R. G., Smithies, O., & Koller, B. H. (1990). Regulatory elements in the introns of the  
955 human HPRT gene are necessary for its expression in embryonic stem cells. *Proceedings of the*

956 *National Academy of Sciences of the United States of America*, 87(11), 4299–303.  
957 <http://doi.org/10.1073/pnas.87.11.4299>

958 Rice, P., Longden, I., & Bleasby, A. (2000). EMBOSS: The European Molecular Biology Open Software  
959 Suite. *Trends in Genetics*, 16(1), 276–277. <http://doi.org/10.1016/j.cocis.2008.07.002>

960 Rincon-Limas, D. E., & Krueger, D. A. (1991). Functional Characterization of the Human Hypoxanthine  
961 Phosphoribosyltransferase Gene Promoter: Evidence for a Negative Regulatory Element. *Molecular  
962 and Cellular Biology*, 11(8), 4157–4164.

963 Sanborn, A. L., Rao, S. S. P., Huang, S.-C., Durand, N. C., Huntley, M. H., Jewett, A. I., ... Aiden, E. L.  
964 (2015). Chromatin extrusion explains key features of loop and domain formation in wild-type and  
965 engineered genomes. *Proceedings of the National Academy of Sciences*, 112(47), 201518552.  
966 <http://doi.org/10.1073/pnas.1518552112>

967 Sanjana, N. E., Shalem, O., & Zhang, F. (2014). Improved vectors and genome-wide libraries for  
968 CRISPR screening. *Nature Methods*, 11(8), 783–784. <http://doi.org/10.1038/nmeth.3047>

969 Sanjana, N. E., Wright, J., Zheng, K., Shalem, O., Fontanillas, P., Joung, J., ... Zhang, F. (2016). High-  
970 resolution interrogation of functional elements in the noncoding genome. *Science*, 353(6307), 1545–  
971 1549.

972 Shalem, O., Sanjana, N. E., Hartenian, E., Shi, X., Scott, D. A., Mikkelsen, T. S., ... Zhang, F. (2014).  
973 Genome-scale CRISPR-Cas9 knockout screening in human cells. *Science*, 343(6166), 1–78.  
974 <http://doi.org/10.1126/science.1247005>. Genome-Scale

975 Tsai, S. Q., Zheng, Z., Nguyen, N. T., Liebers, M., Topkar, V. V., Thapar, V., ... Joung, J. K. (2014).  
976 GUIDE-seq enables genome-wide profiling of off-target cleavage by CRISPR-Cas nucleases.  
977 *Nature Biotechnology*, 33(2), 187–198. <http://doi.org/10.1038/nbt.3117>

978 Wang, T., Wei, J. J., Sabatini, D. M., & Lander, E. S. (2014). Genetic screens in human cells using the  
979 CRISPR-Cas9 system. *Science (New York, N.Y.)*, 343(6166), 80–4.  
980 <http://doi.org/10.1126/science.1246981>

981 Ward, L. D., & Kellis, M. (2012). HaploReg: A resource for exploring chromatin states, conservation,  
982 and regulatory motif alterations within sets of genetically linked variants. *Nucleic Acids Research*,  
983 40(D1), 930–934. <http://doi.org/10.1093/nar/gkr917>

984 Zhou, Y., Zhu, S., Cai, C., Yuan, P., Li, C., Huang, Y., & Wei, W. (2014). High-throughput screening of  
985 a CRISPR/Cas9 library for functional genomics in human cells. *Nature*, 509(7501), 487–91.  
986 <http://doi.org/10.1038/nature13166>

987 Zhu, S., Li, W., Liu, J., Chen, C.-H., Liao, Q., Xu, P., ... Wei, W. (2016). Genome-scale deletion  
988 screening of human long non-coding RNAs using a paired-guide RNA CRISPR–Cas9 library.  
989 *Nature Biotechnology*, 2016(October). <http://doi.org/10.1038/nbt.3715>

990
